# Supplementary material for: Oxone-mediated oxidative carbon-heteroatom bond cleavage: synthesis of benzoxazinones from benzoxazoles with α-oxocarboxylic acids
Source: Royal Society of Chemistry journal article supplement (doi:10.1039/c3ra47660j), 2014-01-01

## Supporting Information

### **Oxone-mediated oxidative carbon-heteroatom bond cleavage: synthesis of benzoxazinones from benzoxazoles with $\alpha$ -oxocarboxylic acids**

Hua Wang<sup>a</sup>, Hua Yang<sup>a</sup>, Yiping Li<sup>b</sup> and Xin-Hua Duan<sup>\*a</sup>

<sup>a</sup>*Department of Chemistry, School of Science and MOE Key Laboratory for Nonequilibrium Synthesis and Modulation of Condensed Matter, Xi'an Jiaotong University, Xi'an 710049, China*

<sup>b</sup>*Department of Pharmacy, College of Medicine, Xi'an Jiaotong University, Xi'an 710061, China.*

duanxh@mail.xjtu.edu.cn

### **Table of Contents**

|                                                                                                          |            |
|----------------------------------------------------------------------------------------------------------|------------|
| General information                                                                                      | <b>S2</b>  |
| Starting materials                                                                                       | <b>S2</b>  |
| General procedure for the oxidative cleavage/coupling of benzoxazoles with $\alpha$ -oxocarboxylic acids | <b>S3</b>  |
| Characterization of products <b>3</b>                                                                    | <b>S4</b>  |
| Characterization of products <b>4</b>                                                                    | <b>S6</b>  |
| References                                                                                               | <b>S11</b> |
| <sup>1</sup> H NMR and <sup>13</sup> C NMR spectra of the products                                       | <b>S12</b> |

### **General information:**

All Reactions were carried out under an atmosphere of nitrogen with the strict exclusion of moisture. The dry DMSO were distilled from CaH<sub>2</sub> under nitrogen and stored over molecular sieves under nitrogen. Diglyme was purchased from commercial sources and stored under nitrogen. Column chromatography was carried out on silica gel. <sup>1</sup>H NMR and <sup>13</sup>C NMR spectra were recorded at 400 MHz and 100 MHz in solvents as indicate. Chemical shift are reported in ppm from CDCl<sub>3</sub> using TMS as internal standard. IR spectra were recorded on an FT-IR spectrometer and only major peaks are reported in cm<sup>-1</sup>. HRMS were obtained on a Q-TOF micro spectrometer. Melting points were determined on a microscopic apparatus and were uncorrected.

### **Starting materials:**

Phenylglyoxylic acid **2a** and pyruvic acids were purchased from Sigma-Aldrich and TCI. Other  $\alpha$ -oxocarboxylic acids were prepared from the corresponding methyl ketones according to the reported procedure.<sup>1</sup>



### Characterization of products 3

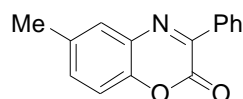

**6-Methyl-3-phenyl-benzo[1,4]oxazin-2-one (3a).** Known compound,<sup>2</sup>  $R_f$  0.3 (EtOAc/petroleum ether = 20:1);  $^1\text{H}$  NMR (400 MHz,  $\text{CDCl}_3$ ):  $\delta$  = 8.34-8.31 (dd,  $J$  = 1.6, 7.6 Hz, 2H),  $\delta$  = 7.65 (s, 1H),  $\delta$  = 7.55-7.47 (m, 3H),  $\delta$  = 7.34-7.31 (dd,  $J$  = 1.6, 8.4 Hz, 1H),  $\delta$  = 7.24-7.22 (d,  $J$  = 8.4 Hz, 1H), 2.46 (s, 3H);  $^{13}\text{C}$  NMR (100 MHz,  $\text{CDCl}_3$ ):  $\delta$  = 152.5, 150.7, 144.4, 135.5, 134.3, 132.1, 131.4, 131.3, 129.4, 129.3, 128.4, 115.7, 20.9.

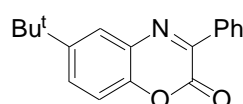

**6-tert-Butyl-3-phenyl-benzo[1,4]oxazin-2-one (3b).** Known compound,<sup>2</sup>  $R_f$  0.3 (EtOAc/petroleum ether = 20:1);  $^1\text{H}$  NMR (400 MHz,  $\text{CDCl}_3$ ):  $\delta$  = 8.34-8.32 (dd,  $J$  = 1.6, 8.0 Hz, 2H),  $\delta$  = 7.87-7.86 (d,  $J$  = 2.0 Hz, 1H),  $\delta$  = 7.58-7.49 (m, 4H),  $\delta$  = 7.28-7.26 (d,  $J$  = 8.4 Hz, 1H), 1.40 (s, 9H);  $^{13}\text{C}$  NMR (100 MHz,  $\text{CDCl}_3$ ):  $\delta$  = 152.6, 150.7, 149.0, 144.2, 134.3, 131.3, 131.2, 129.4, 128.7, 128.4, 126.0, 115.5, 34.7, 31.3.

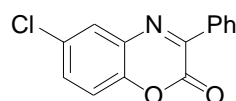

**6-Chloro-3-phenyl-benzo[1,4]oxazin-2-one (3c).** Known compound,<sup>2</sup>  $R_f$  0.4 (EtOAc/petroleum ether = 20:1);  $^1\text{H}$  NMR (400 MHz,  $\text{CDCl}_3$ ):  $\delta$  = 8.34-8.33 (d,  $J$  = 7.2 Hz, 2H),  $\delta$  = 7.85-7.84 (d,  $J$  = 2.0 Hz, 1H),  $\delta$  = 7.58-7.45 (m, 4H),  $\delta$  = 7.28-7.26 (d,  $J$  = 8.8 Hz, 1H);  $^{13}\text{C}$  NMR (100 MHz,  $\text{CDCl}_3$ ):  $\delta$  = 151.7, 151.6, 145.0, 133.7, 132.1, 131.9, 130.9, 130.7, 129.6, 128.8, 128.4, 117.3.

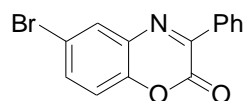

**6-Bromo-3-phenyl-benzo[1,4]oxazin-2-one (3d).** A yellow solid,  $R_f$  0.35 (EtOAc/petroleum ether = 20:1), mp: 148-150 °C;  $^1\text{H}$  NMR (400 MHz,  $\text{CDCl}_3$ ):  $\delta$  =

8.35-8.33 (d,  $J = 7.6$  Hz, 2H),  $\delta = 8.01$  (s, 1H),  $\delta = 7.62$ -7.60 (d,  $J = 8.8$  Hz, 1H),  $\delta = 7.56$ -7.49 (m, 3H),  $\delta = 7.24$ -7.22 (d,  $J = 8.8$  Hz, 1H);  $^{13}\text{C}$  NMR (100 MHz,  $\text{CDCl}_3$ ):  $\delta = 151.7, 151.6, 145.5, 133.8, 133.7, 132.5, 131.9, 129.6, 128.5, 117.9, 117.6$ ; IR (KBr):  $\nu_{\text{max}}$  3437, 2925, 1743, 1384, 1124, 810  $\text{cm}^{-1}$ ; HRMS (ESI) calcd for  $\text{C}_{14}\text{H}_8\text{BrNNaO}_2$   $[\text{M}+\text{Na}]^+$  323.9631, found 323.9637.

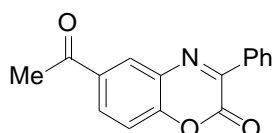

**6-Acetyl-3-phenyl-benzo[1,4]oxazin-2-one (3e).** A yellow solid,  $R_f$  0.2 (EtOAc/petroleum ether = 2:1), mp: 159-161  $^\circ\text{C}$ ;  $^1\text{H}$  NMR (400 MHz,  $\text{CDCl}_3$ ):  $\delta = 8.44$  (s, 1H),  $\delta = 8.36$ -8.34 (d,  $J = 7.2$  Hz, 2H),  $\delta = 8.17$ -8.14 (d,  $J = 8.8$  Hz, 1H),  $\delta = 7.58$ -7.51 (m, 3H),  $\delta = 7.43$ -7.41 (d,  $J = 8.8$  Hz, 1H), 2.70 (s, 3H);  $^{13}\text{C}$  NMR (100 MHz,  $\text{CDCl}_3$ ):  $\delta = 196.0, 151.7, 151.5, 149.5, 134.6, 133.6, 131.9, 131.1, 130.6, 130.2, 129.5, 128.5, 116.7, 26.7$ ; IR (KBr):  $\nu_{\text{max}}$  3430, 2923, 1742, 1602, 1118, 812  $\text{cm}^{-1}$ ; HRMS (ESI) calcd for  $\text{C}_{16}\text{H}_{11}\text{NNaO}_3$   $[\text{M}+\text{Na}]^+$  288.0631, found 288.0621.

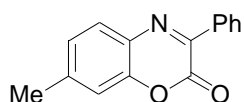

**7-Methyl-3-phenyl-benzo[1,4]oxazin-2-one (3f).** Known compound,<sup>2</sup>  $R_f$  0.3 (EtOAc/petroleum ether = 20:1);  $^1\text{H}$  NMR (400 MHz,  $\text{CDCl}_3$ ):  $\delta = 8.32$ -8.30 (d,  $J = 7.6$  Hz, 2H),  $\delta = 7.73$ -7.71 (d,  $J = 8.4$  Hz, 1H),  $\delta = 7.51$ -7.48 (m, 3H),  $\delta = 7.21$ -7.19 (d,  $J = 8.0$  Hz, 1H), 7.13 (s, 1H), 2.49 (s, 3H);  $^{13}\text{C}$  NMR (100 MHz,  $\text{CDCl}_3$ ):  $\delta = 152.5, 149.6, 146.4, 142.6, 134.3, 131.1, 129.7, 129.3, 129.0, 128.3, 126.7, 116.2, 21.8$ .

## Characterization of Products 4

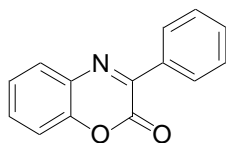

**3-Phenyl-benzo[1,4]oxazin-2-one (4a).** Known compound,<sup>2</sup>  $R_f$  0.35 (EtOAc/petroleum ether = 20:1);  $^1\text{H}$  NMR (400 MHz,  $\text{CDCl}_3$ ):  $\delta$  = 8.35-8.33 (d,  $J$  = 7.6 Hz, 2H),  $\delta$  = 7.87-7.85 (d,  $J$  = 7.6 Hz, 1H),  $\delta$  = 7.54-7.49 (m, 4H),  $\delta$  = 7.42-7.38 (t,  $J$  = 7.6 Hz, 1H),  $\delta$  = 7.35-7.33 (d,  $J$  = 8.0 Hz, 1H);  $^{13}\text{C}$  NMR (100 MHz,  $\text{CDCl}_3$ ):  $\delta$  = 152.3, 150.9, 146.5, 134.1, 131.7, 131.4, 131.1, 129.4, 128.4, 125.5, 116.2.

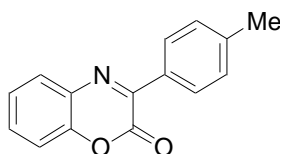

**3-p-Tolyl-benzo[1,4]oxazin-2-one (4b).** Known compound,<sup>2</sup>  $R_f$  0.35 (EtOAc/petroleum ether = 20:1);  $^1\text{H}$  NMR (400 MHz,  $\text{CDCl}_3$ ):  $\delta$  = 8.28-8.25 (d,  $J$  = 8.4 Hz, 2H),  $\delta$  = 7.85-7.82 (dd,  $J$  = 1.2, 8.0 Hz, 1H),  $\delta$  = 7.52-7.47 (dt,  $J$  = 1.2, 8.4 Hz, 1H),  $\delta$  = 7.40-7.36 (dt,  $J$  = 0.8, 7.6 Hz, 1H),  $\delta$  = 7.33-7.30 (m, 3H), 2.44 (s, 3H);  $^{13}\text{C}$  NMR (100 MHz,  $\text{CDCl}_3$ ):  $\delta$  = 152.3, 150.6, 146.4, 142.0, 131.7, 131.4, 130.8, 129.4, 129.3, 129.1, 125.5, 116.1, 21.6.

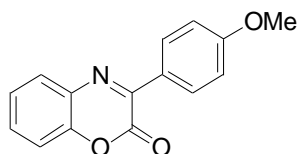

**3-(4-Methoxy-phenyl)-benzo[1,4]oxazin-2-one (4c).** A yellow solid,  $R_f$  0.2 (EtOAc/petroleum ether = 15:1), mp: 133-135 °C;  $^1\text{H}$  NMR (400 MHz,  $\text{CDCl}_3$ ):  $\delta$  = 8.41-8.39 (d,  $J$  = 8.8 Hz, 2H),  $\delta$  = 7.82-7.80 (d,  $J$  = 8.0 Hz, 1H),  $\delta$  = 7.49-7.46 (t,  $J$  = 8.4 Hz, 1H),  $\delta$  = 7.39-7.35 (t,  $J$  = 7.6 Hz, 1H),  $\delta$  = 7.32-7.30 (d,  $J$  = 8.0 Hz, 1H),

7.01-6.99 (d,  $J = 8.8$  Hz, 2H), 3.89 (s, 3H);  $^{13}\text{C}$  NMR (100 MHz,  $\text{CDCl}_3$ ):  $\delta = 162.4$ , 152.5, 149.8, 146.3, 131.7, 131.4, 130.4, 129.1, 126.8, 125.4, 116.0, 113.8, 55.4; IR (KBr):  $\nu_{\text{max}}$  3434, 2930, 1730, 1603, 1133, 759  $\text{cm}^{-1}$ ; HRMS (ESI) calcd for  $\text{C}_{15}\text{H}_{11}\text{NNaO}_3$   $[\text{M}+\text{Na}]^+$  276.0631, found 276.0623.

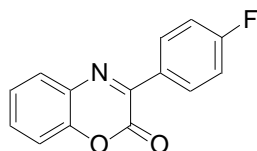

**3-(4-Fluoro-phenyl)-benzo[1,4]oxazin-2-one (4d).** Known compound,<sup>2</sup>  $R_f$  0.4 (EtOAc/petroleum ether = 20:1);  $^1\text{H}$  NMR (400 MHz,  $\text{CDCl}_3$ ):  $\delta = 8.43$ -8.40 (m, 2H),  $\delta = 7.85$ -7.83 (d,  $J = 8.0$  Hz, 1H),  $\delta = 7.54$ -7.50 (dt,  $J = 0.8$ , 8.0 Hz, 1H),  $\delta = 7.42$ -7.38 (t,  $J = 7.6$  Hz, 1H),  $\delta = 7.35$ -7.33 (d,  $J = 8.0$  Hz, 1H), 7.20-7.16 (t,  $J = 8.8$  Hz, 2H);  $^{13}\text{C}$  NMR (100 MHz,  $\text{CDCl}_3$ ):  $\delta = 164.8$  (d,  $J_{\text{C,F}} = 252.0$  Hz), 152.2, 149.5, 146.4, 131.9, 131.8, 131.5, 131.2, 130.3, 129.4, 125.6, 116.2, 115.6, 115.4.

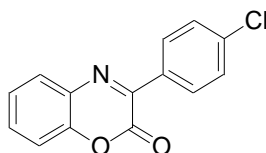

**3-(4-Chloro-phenyl)-benzo[1,4]oxazin-2-one (4e).** Known compound,<sup>2</sup>  $R_f$  0.4 (EtOAc/petroleum ether = 20:1);  $^1\text{H}$  NMR (400 MHz,  $\text{CDCl}_3$ ):  $\delta = 8.36$ -8.34 (d,  $J = 8.8$  Hz, 2H),  $\delta = 7.85$ -7.83 (dd,  $J = 1.2$ , 8.0 Hz, 1H),  $\delta = 7.55$ -7.51 (dt,  $J = 1.2$ , 8.4 Hz, 1H),  $\delta = 7.48$ -7.46 (d,  $J = 8.8$  Hz, 2H),  $\delta = 7.42$ -7.38 (t,  $J = 7.6$  Hz, 1H), 7.35-7.33 (d,  $J = 8.0$  Hz, 1H);  $^{13}\text{C}$  NMR (100 MHz,  $\text{CDCl}_3$ ):  $\delta = 152.1$ , 149.5, 146.5, 137.8, 132.5, 131.5, 131.4, 130.8, 129.5, 128.7, 125.7, 116.2.

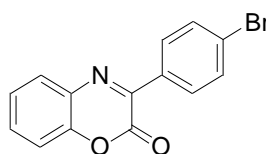

**3-(4-Bromo-phenyl)-benzo[1,4]oxazin-2-one (4f).** Known compound,<sup>2</sup>  $R_f$  0.4 (EtOAc/petroleum ether = 20:1);  $^1\text{H}$  NMR (400 MHz,  $\text{CDCl}_3$ ):  $\delta$  = 8.27-8.25 (d,  $J$  = 8.4 Hz, 2H),  $\delta$  = 7.85-7.83 (dd,  $J$  = 0.8, 8.0 Hz, 1H),  $\delta$  = 7.63-7.61 (d,  $J$  = 8.8 Hz, 2H),  $\delta$  = 7.55-7.51 (dt,  $J$  = 0.8, 8.4 Hz, 1H),  $\delta$  = 7.42-7.38 (t,  $J$  = 7.6 Hz, 1H), 7.34-7.32 (d,  $J$  = 8.4 Hz, 1H);  $^{13}\text{C}$  NMR (100 MHz,  $\text{CDCl}_3$ ):  $\delta$  = 152.1, 149.5, 146.4, 132.9, 131.6, 131.5, 131.4, 131.0, 129.5, 126.4, 125.7, 116.2.

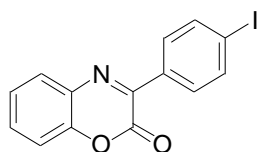

**3-(4-Iodo-phenyl)-benzo[1,4]oxazin-2-one (4g).** A yellow solid,  $R_f$  0.4 (EtOAc/petroleum ether = 20:1), mp: 126-128 °C;  $^1\text{H}$  NMR (400 MHz,  $\text{CDCl}_3$ ):  $\delta$  = 8.11-8.09 (d,  $J$  = 8.4 Hz, 2H),  $\delta$  = 7.84-7.82 (m, 3H),  $\delta$  = 7.55-7.51 (dt,  $J$  = 1.2, 8.4 Hz, 1H),  $\delta$  = 7.41-7.37 (t,  $J$  = 8.0 Hz, 1H),  $\delta$  = 7.33-7.31 (d,  $J$  = 8.0 Hz, 1H);  $^{13}\text{C}$  NMR (100 MHz,  $\text{CDCl}_3$ ):  $\delta$  = 152.0, 149.7, 146.4, 137.6, 133.4, 131.5, 131.4, 130.9, 129.5, 125.7, 116.2, 98.9; IR (KBr):  $\nu_{\text{max}}$  3436, 2924, 1731, 1585, 1111, 750  $\text{cm}^{-1}$ ; HRMS (ESI) calcd for  $\text{C}_{14}\text{H}_8\text{INNaO}_2$  [ $\text{M}+\text{Na}$ ] $^+$  371.9492, found 371.9504.

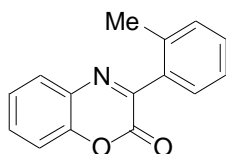

**3-o-Tolyl-benzo[1,4]oxazin-2-one (4h).** A yellow solid,  $R_f$  0.4 (EtOAc/petroleum ether = 20:1), mp: 124-126 °C;  $^1\text{H}$  NMR (400 MHz,  $\text{CDCl}_3$ ):  $\delta$  = 7.85-7.83 (dd,  $J$  = 1.2, 8.0 Hz, 1H),  $\delta$  = 7.58-7.52 (m, 2H),  $\delta$  = 7.43-7.36 (m, 3H),  $\delta$  = 7.33-7.30 (m, 2H),  $\delta$  = 2.41 (s, 3H);  $^{13}\text{C}$  NMR (100 MHz,  $\text{CDCl}_3$ ):  $\delta$  = 155.0, 152.4, 146.7, 137.2, 134.0, 131.4, 130.9, 130.2, 129.5, 125.8, 125.6, 116.4, 20.1; IR (KBr):  $\nu_{\text{max}}$  3436, 2929, 1730,



1456, 1133, 761  $\text{cm}^{-1}$ ; HRMS (ESI) calcd for  $\text{C}_{15}\text{H}_{11}\text{NNaO}_2$   $[\text{M}+\text{Na}]^+$  260.0682, found 260.0680.

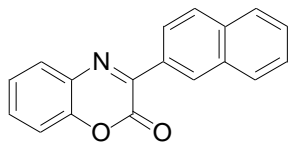

**3-Naphthalen-2-yl-benzo[1,4]oxazin-2-one (4j).** A yellow solid,  $R_f$  0.2 (EtOAc/petroleum ether = 20:1), mp: 173-175  $^{\circ}\text{C}$ ;  $^1\text{H}$  NMR (400 MHz,  $\text{CDCl}_3$ ):  $\delta$  = 9.07 (s, 1H),  $\delta$  = 8.42-8.39 (dd,  $J$  = 1.2, 8.4 Hz, 1H),  $\delta$  = 8.02-8.00 (d,  $J$  = 8.0 Hz, 1H),  $\delta$  = 7.95-7.87 (m, 3H),  $\delta$  = 7.60-7.51 (m, 3H),  $\delta$  = 7.43-7.40 (t,  $J$  = 7.2 Hz, 1H),  $\delta$  = 7.37-7.35 (d,  $J$  = 8.4 Hz, 1H);  $^{13}\text{C}$  NMR (100 MHz,  $\text{CDCl}_3$ ):  $\delta$  = 152.4, 150.2, 146.4, 134.7, 132.8, 131.7, 131.4, 131.1, 129.6, 129.4, 128.0, 127.9, 127.6, 126.5, 125.6, 125.3, 116.1; IR (KBr):  $\nu_{\text{max}}$  3462, 2925, 1744, 1605, 1108, 751  $\text{cm}^{-1}$ ; HRMS (ESI) calcd for  $\text{C}_{18}\text{H}_{11}\text{NNaO}_2$   $[\text{M}+\text{Na}]^+$  296.0682, found 296.0677.

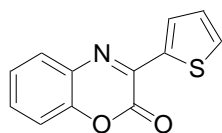

**3-Thiophen-2-yl-benzo[1,4]oxazin-2-one (4k).** Known compound,<sup>2</sup>  $R_f$  0.4 (EtOAc/petroleum ether = 20:1);  $^1\text{H}$  NMR (400 MHz,  $\text{CDCl}_3$ ):  $\delta$  = 8.43-8.42 (m, 1H),  $\delta$  = 7.80-7.78 (dd,  $J$  = 1.2, 7.6 Hz, 1H),  $\delta$  = 7.62-7.61 (d,  $J$  = 4.8 Hz, 1H),  $\delta$  = 7.50-7.46 (dt,  $J$  = 1.2, 8.0 Hz, 1H),  $\delta$  = 7.40-7.36 (m, 1H),  $\delta$  = 7.33-7.31 (d,  $J$  = 8.4 Hz, 1H),  $\delta$  = 7.20-7.18 (t,  $J$  = 4.8 Hz, 1H);  $^{13}\text{C}$  NMR (100 MHz,  $\text{CDCl}_3$ ):  $\delta$  = 151.5, 146.0, 145.6, 138.5, 133.3, 132.5, 131.5, 130.5, 128.9, 128.6, 125.7, 116.2.

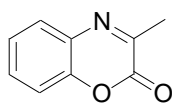

**3-Methyl-benzo[1,4]oxazin-2-one (4l)**. Known compound,<sup>2</sup>  $R_f$  0.2 (EtOAc/petroleum ether = 20:1);  $^1\text{H}$  NMR (400 MHz,  $\text{CDCl}_3$ ):  $\delta$  = 7.72-7.70 (dd,  $J$  = 1.2, 8.0 Hz, 1H),  $\delta$  = 7.49-7.45 (dt,  $J$  = 1.2, 8.0 Hz, 1H),  $\delta$  = 7.37-7.33 (dt,  $J$  = 1.2, 8.0 Hz, 1H),  $\delta$  = 7.30-7.28 (d,  $J$  = 8.4 Hz, 1H),  $\delta$  = 2.58 (s, 3H);  $^{13}\text{C}$  NMR (100 MHz,  $\text{CDCl}_3$ ):  $\delta$  = 155.2, 153.3, 146.6, 131.2, 130.5, 128.6, 125.4, 116.4, 21.3.

## References

1. Wadhwa, K.; Yang, C.; West, P. R.; Deming, K. C.; Chemburkar, S. R.; Reddy, R. E. *Synth. Commun.* **2008**, *38*, 4434.
2. (a) Rueping, M.; Antonchick, A. P.; Theissmann, T. *Angew. Chem. Int. Ed.* **2006**, *45*, 6751. (b) Xue, Z.-Y.; Jiang, Y.; Peng, X.-Z.; Yuan, W.-C.; Zhang, X.-M. *Adv. Synth. Catal.* **2010**, *352*, 2132. (c) Chen, Q.-A.; Chen, M.-W.; Yu, C.-B.; Shi, L.; Wang, D.-S.; Yang, Y.; Zhou, Y.-G. *J. Am. Chem. Soc.* **2011**, *133*, 16432. (d) Yavari, I.; Sour, S.; Sirouspour, M.; Djahaniani, H. *Synthesis* **2006**, 3243.

## $^1\text{H}$ NMR and $^{13}\text{C}$ NMR Spectra of the Products

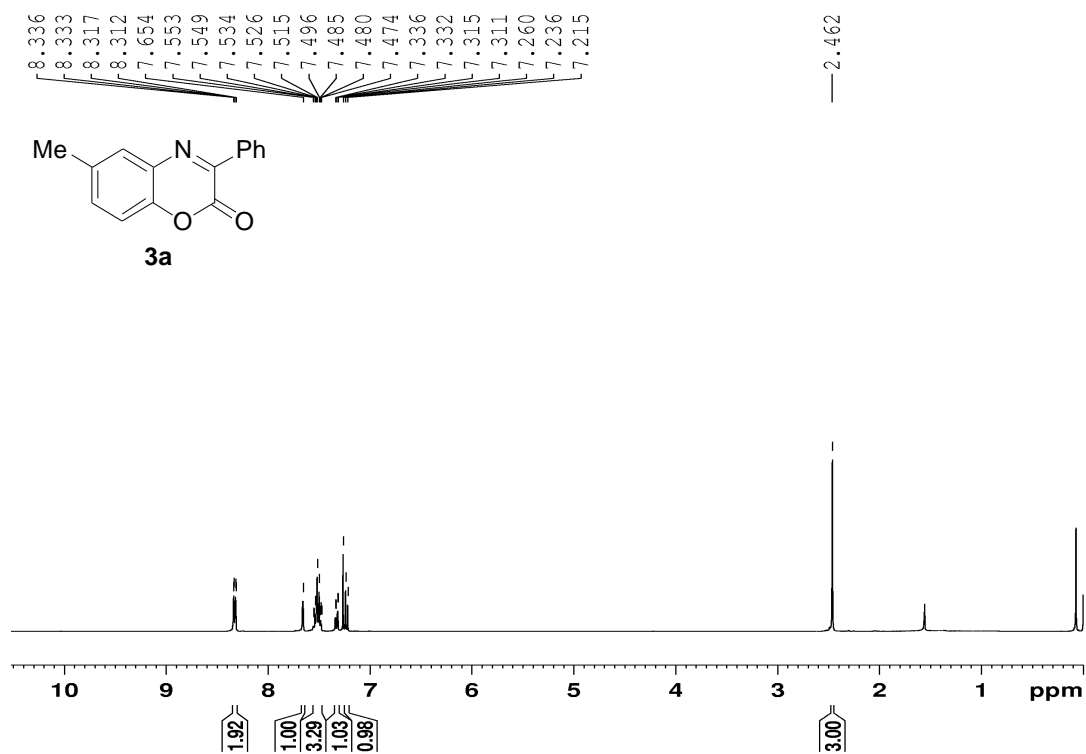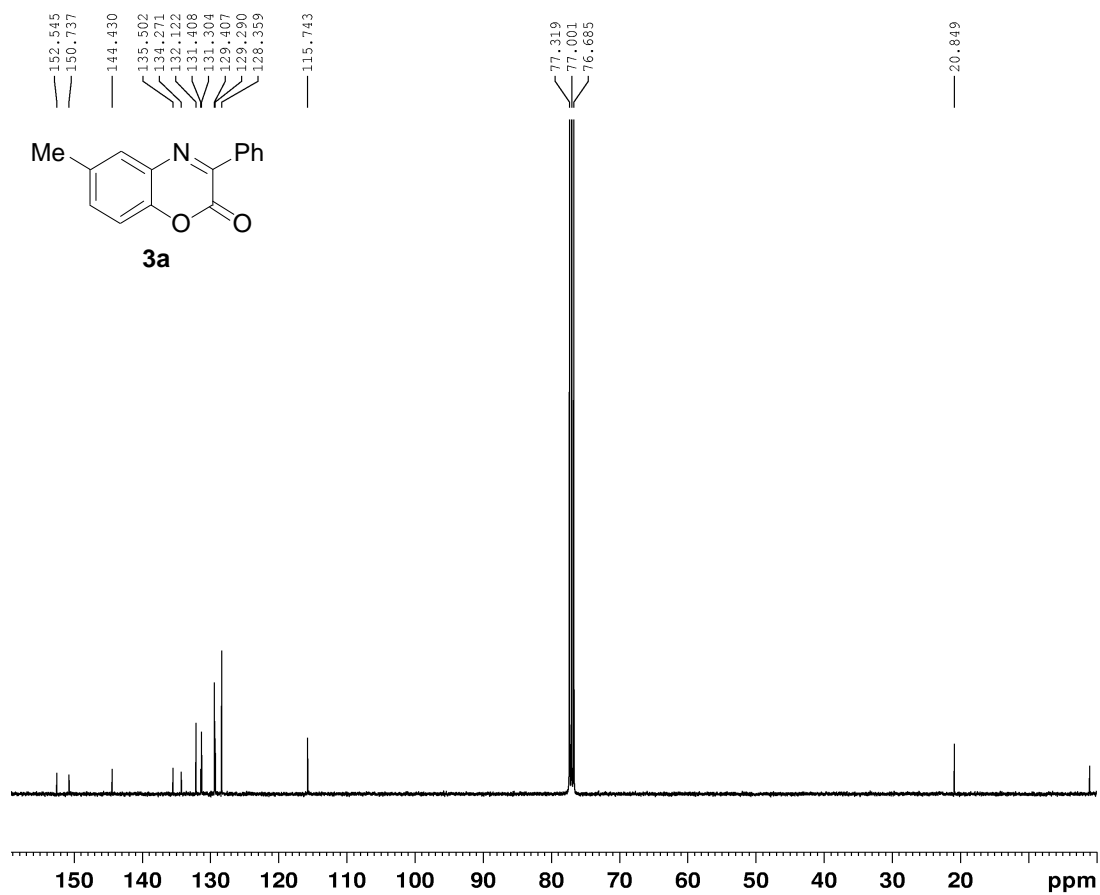

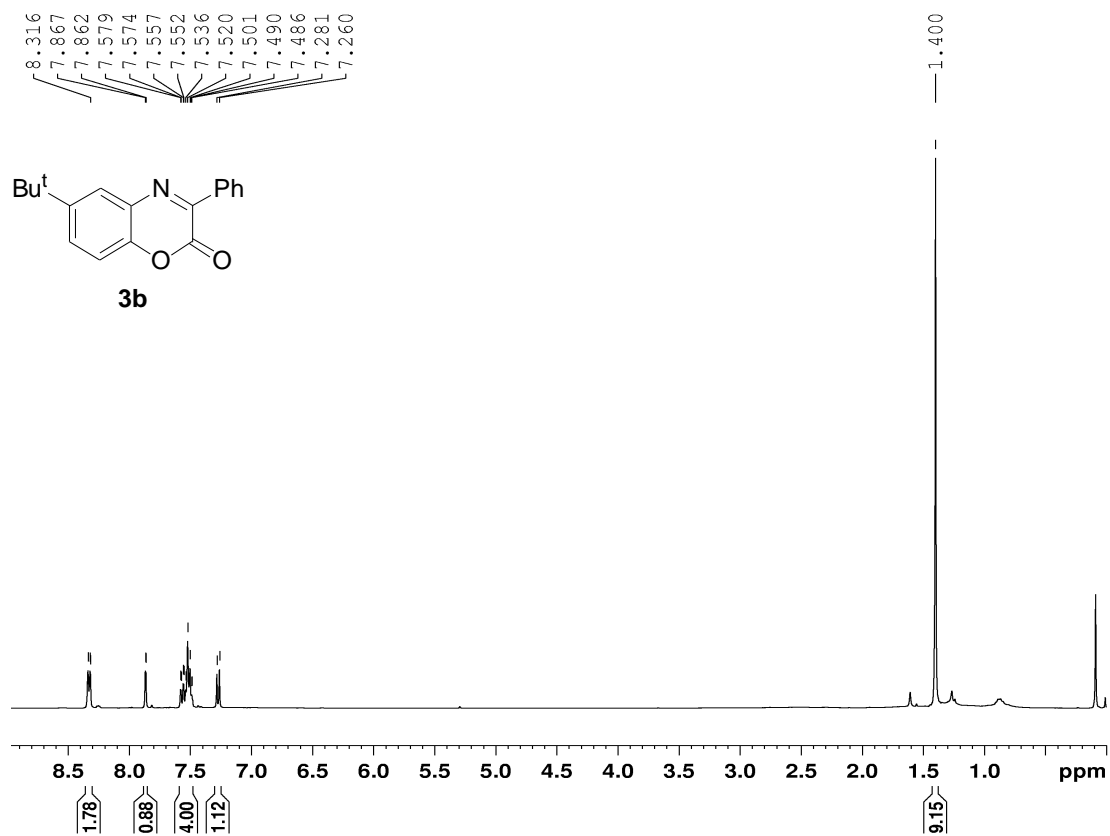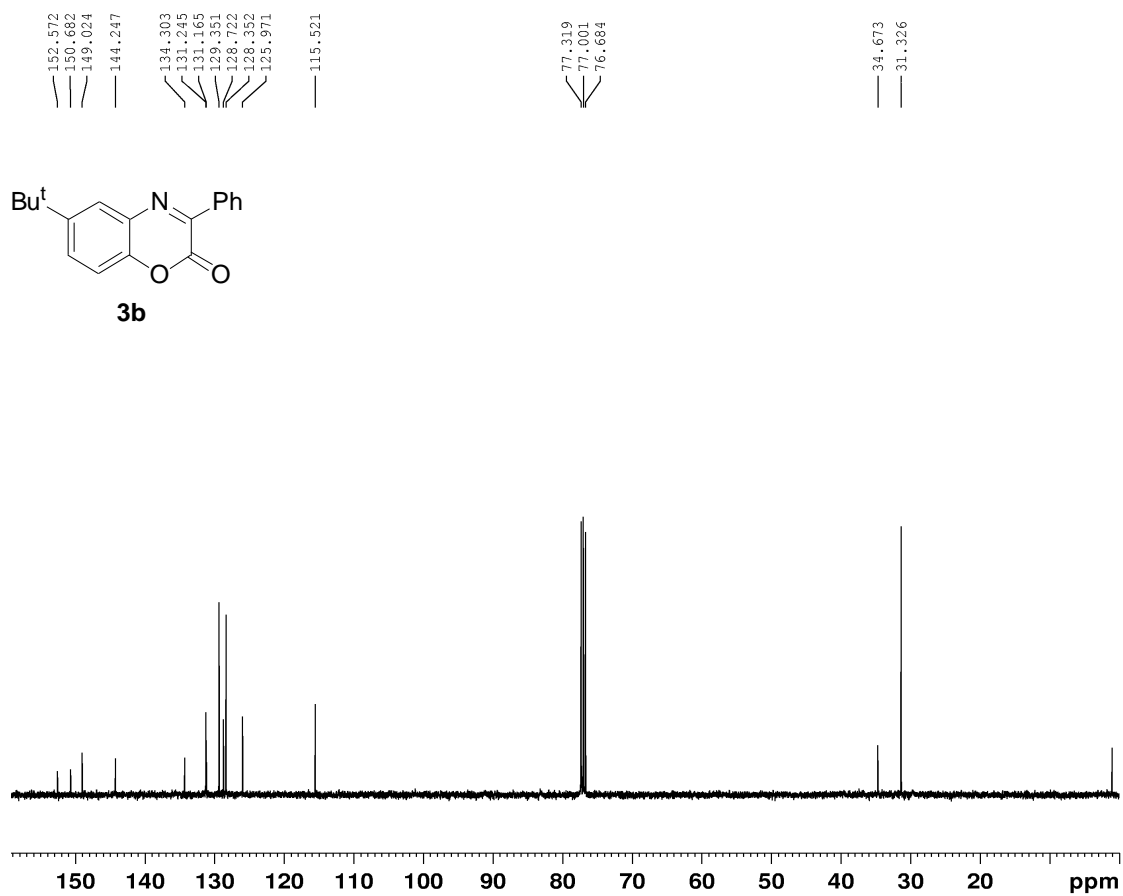

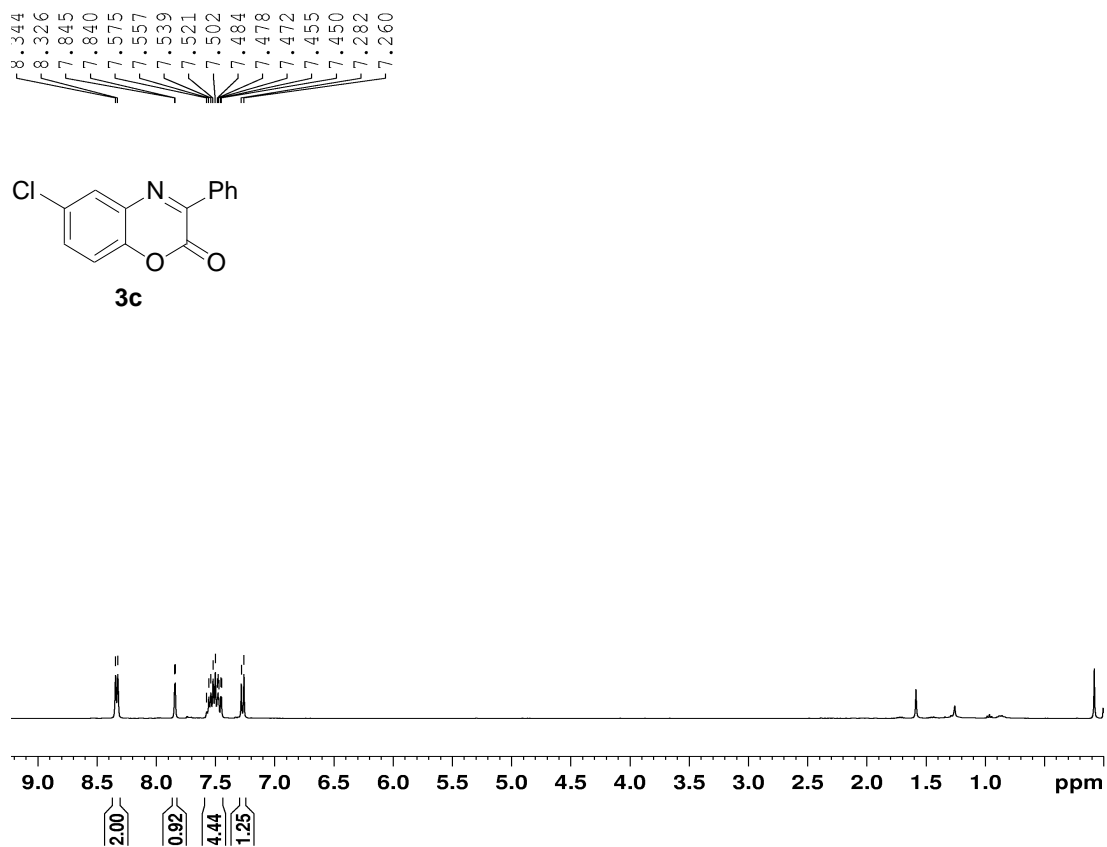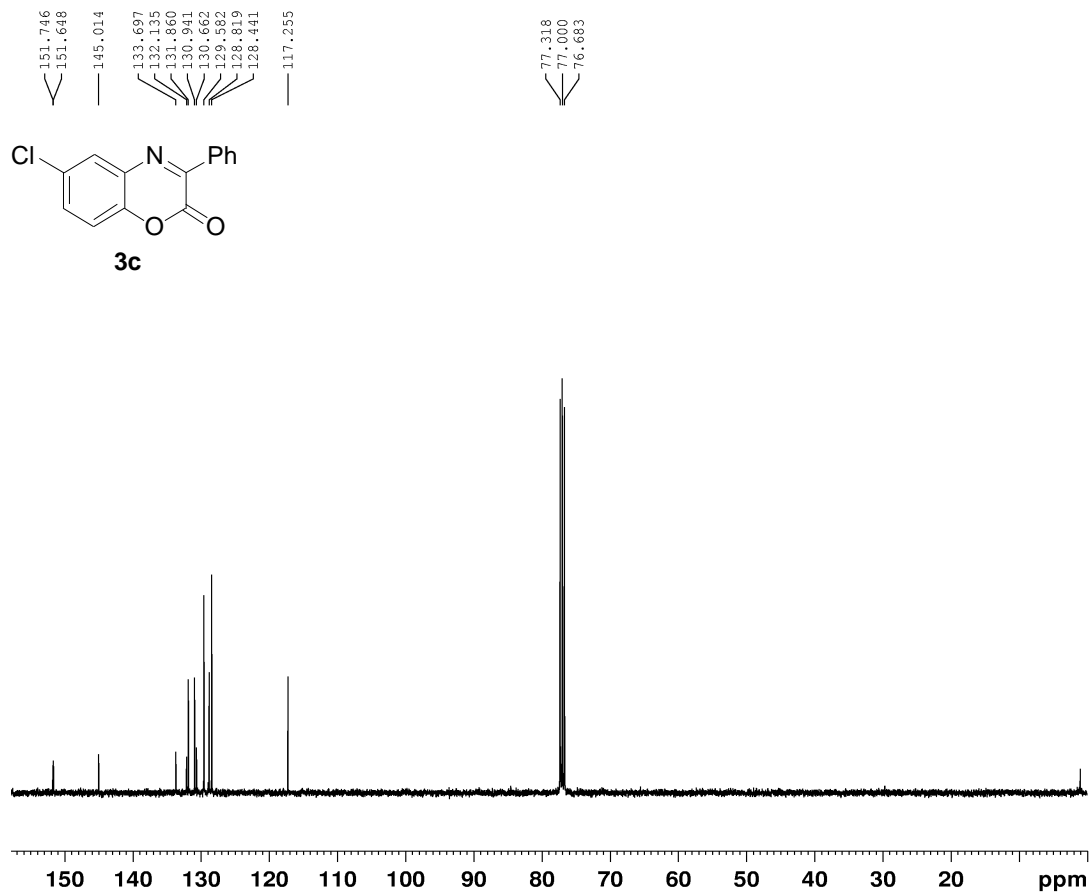

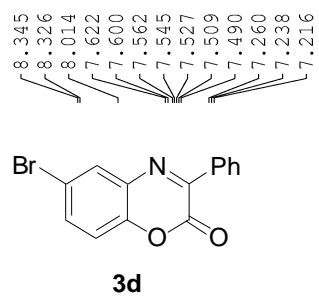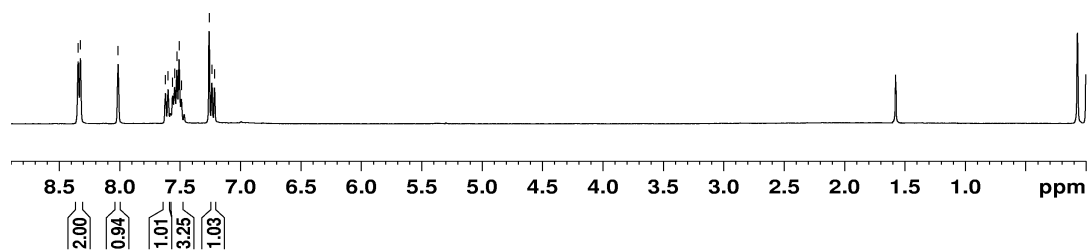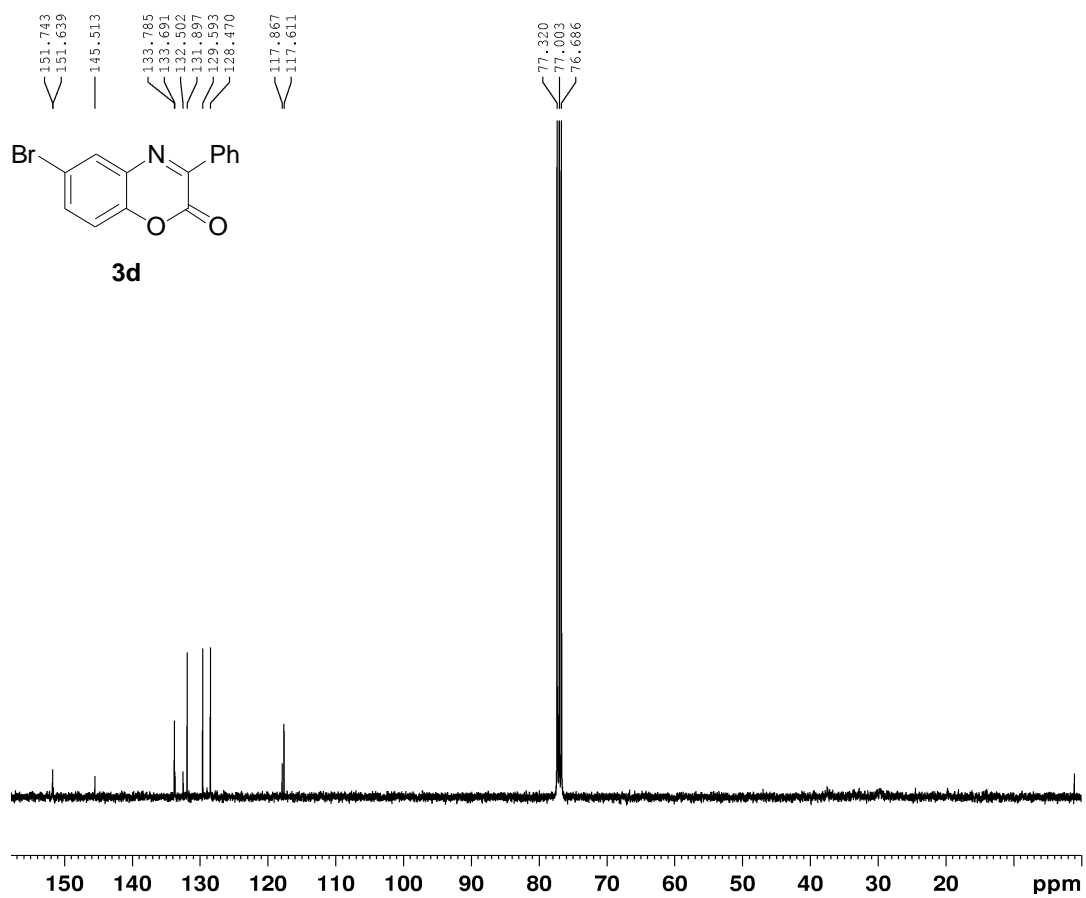

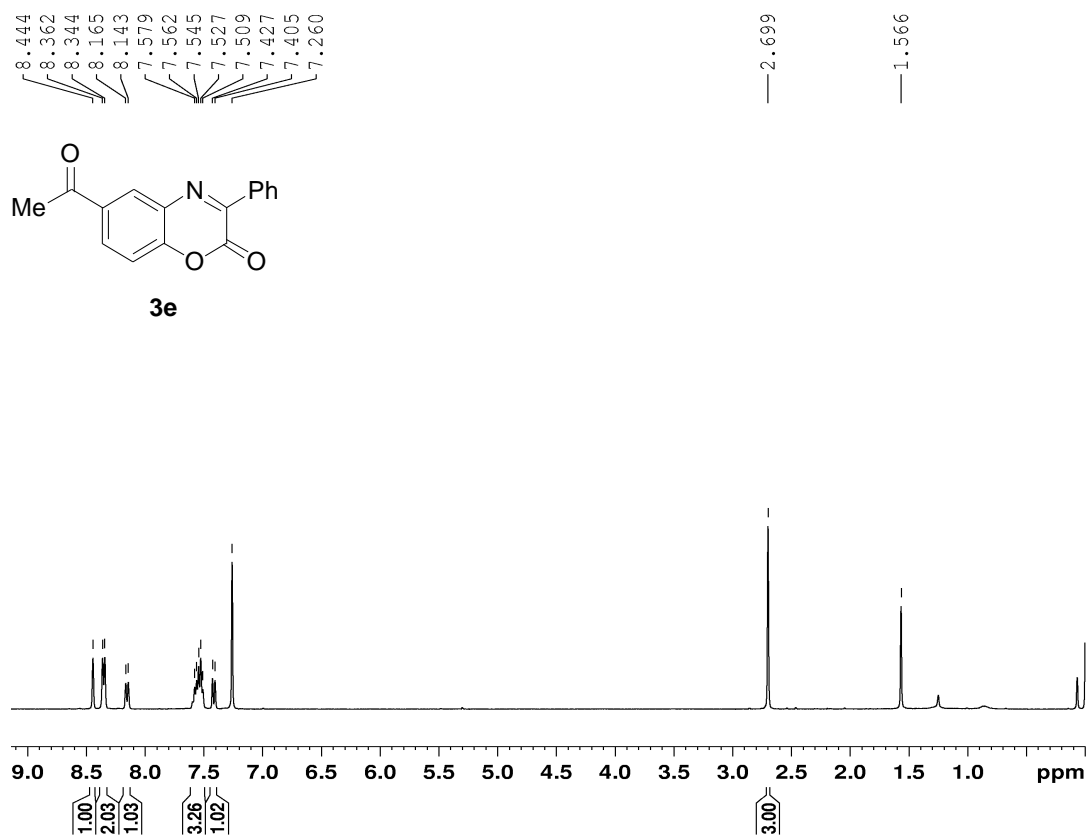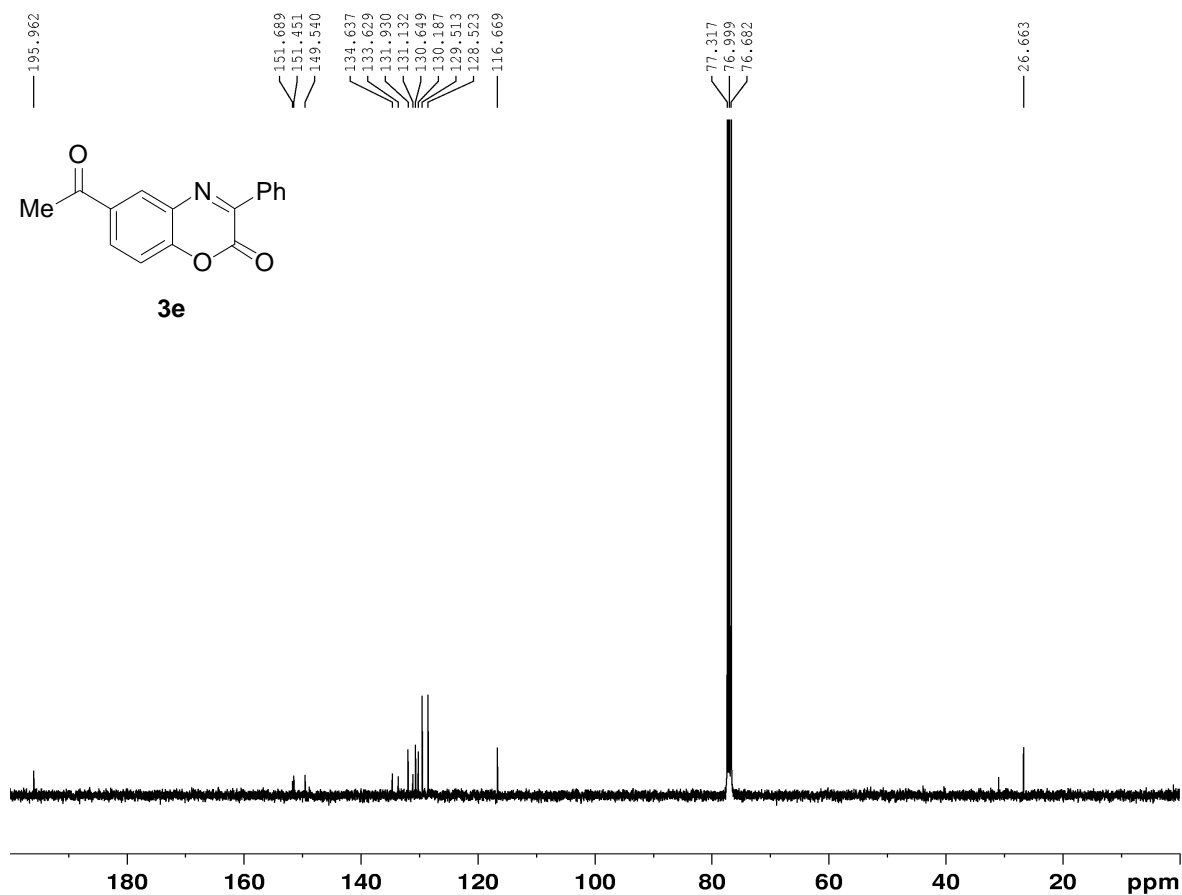



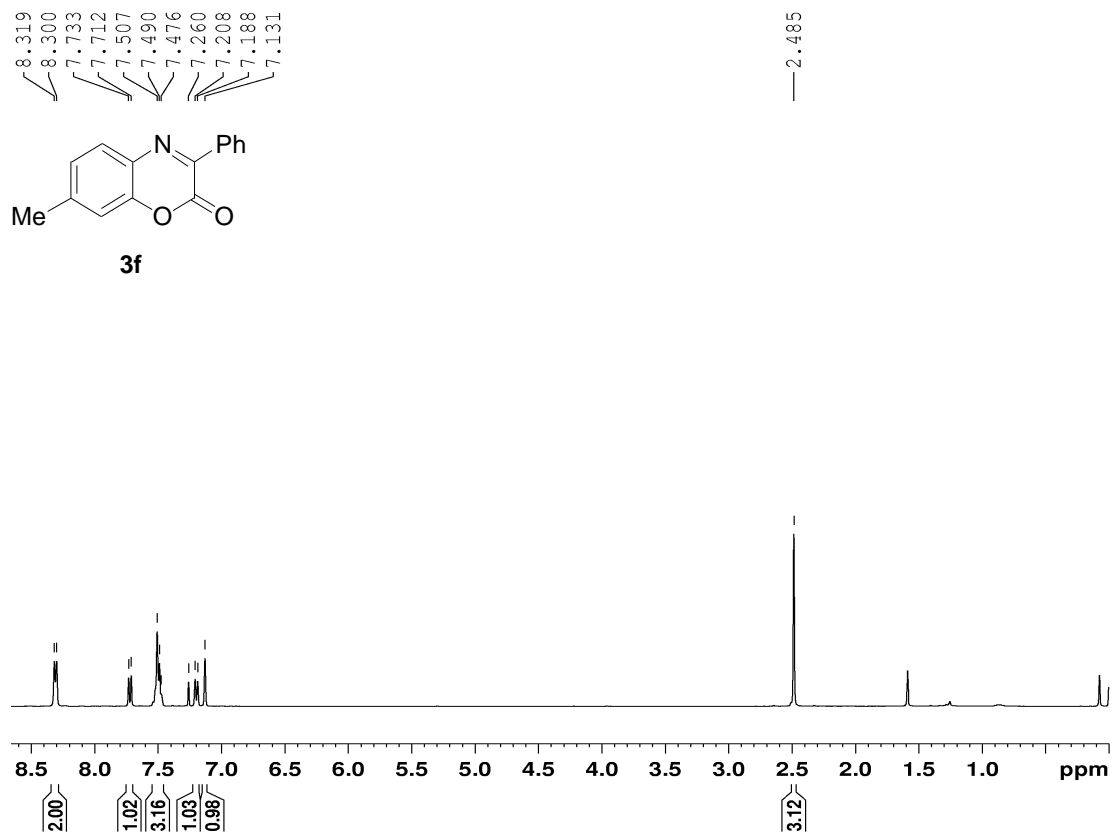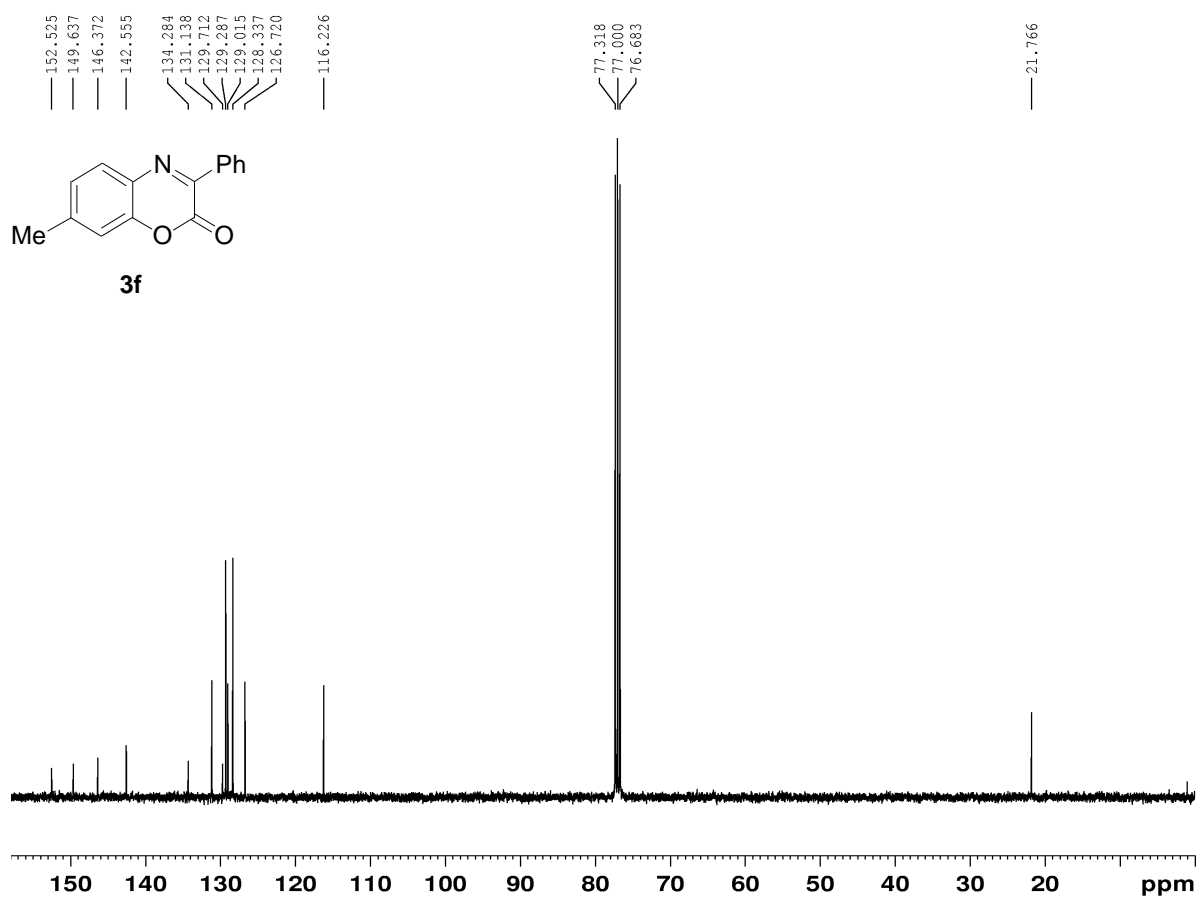

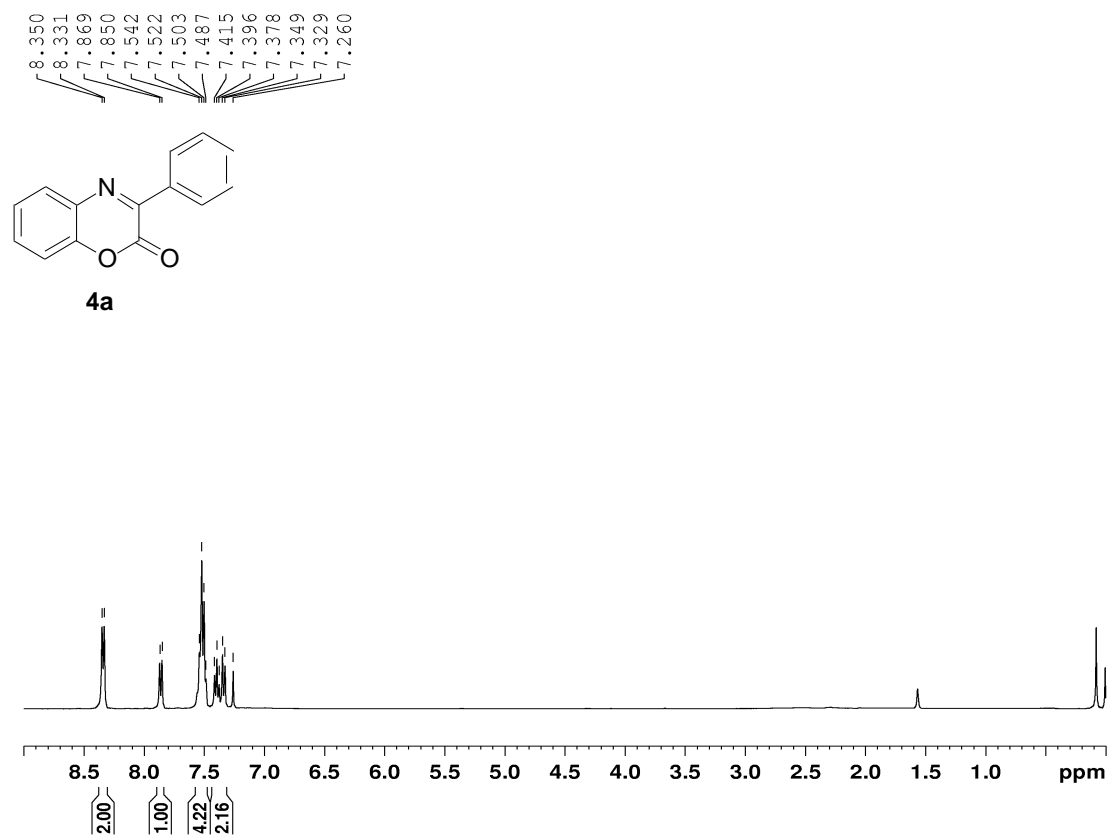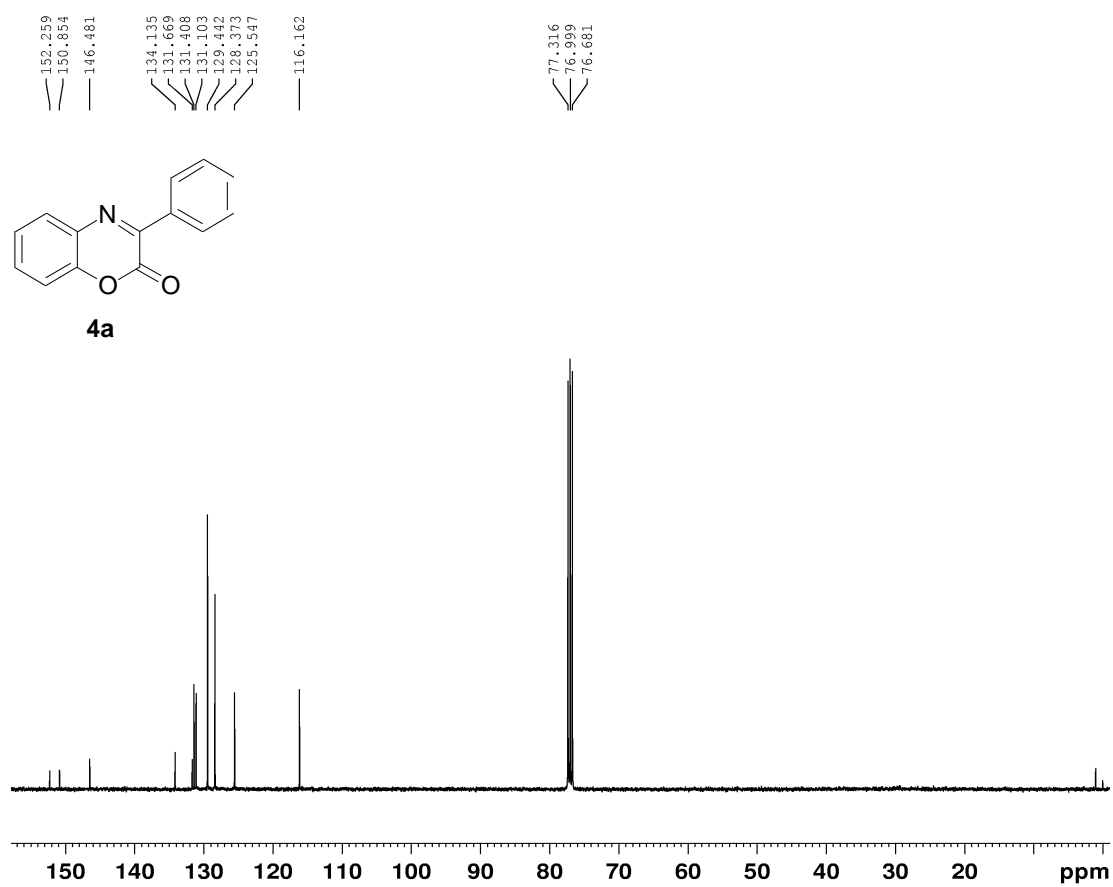

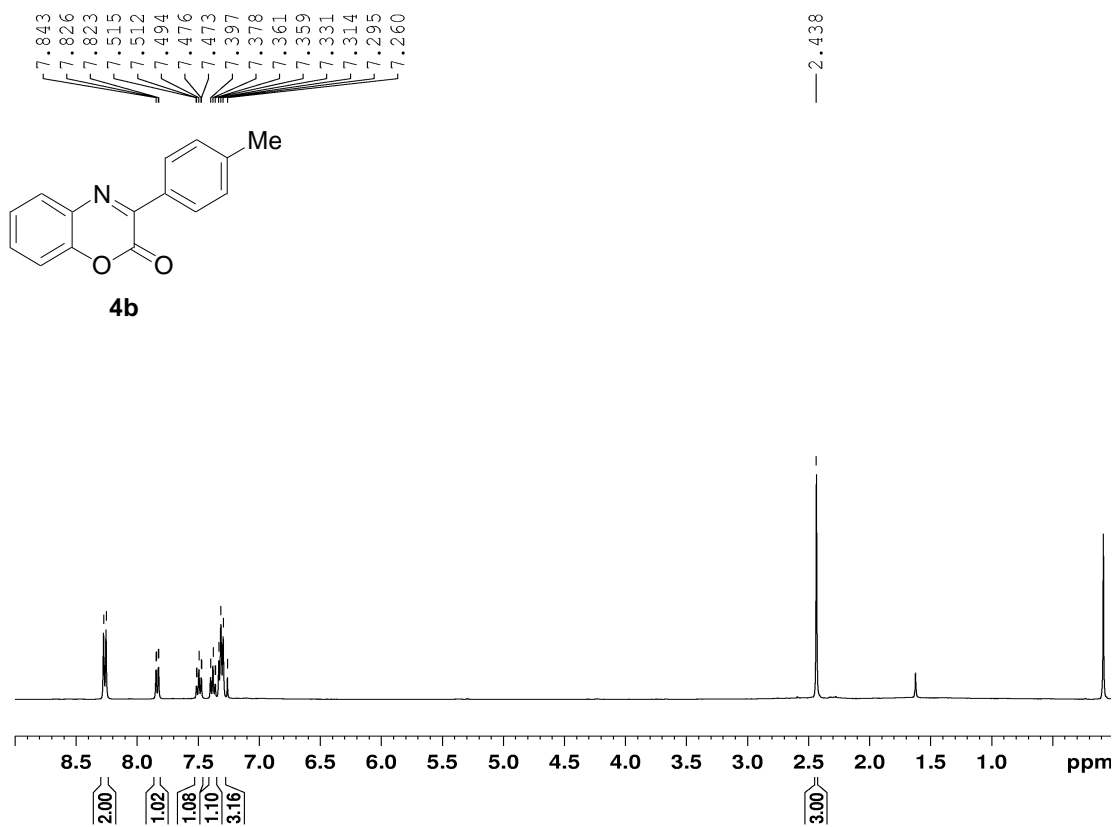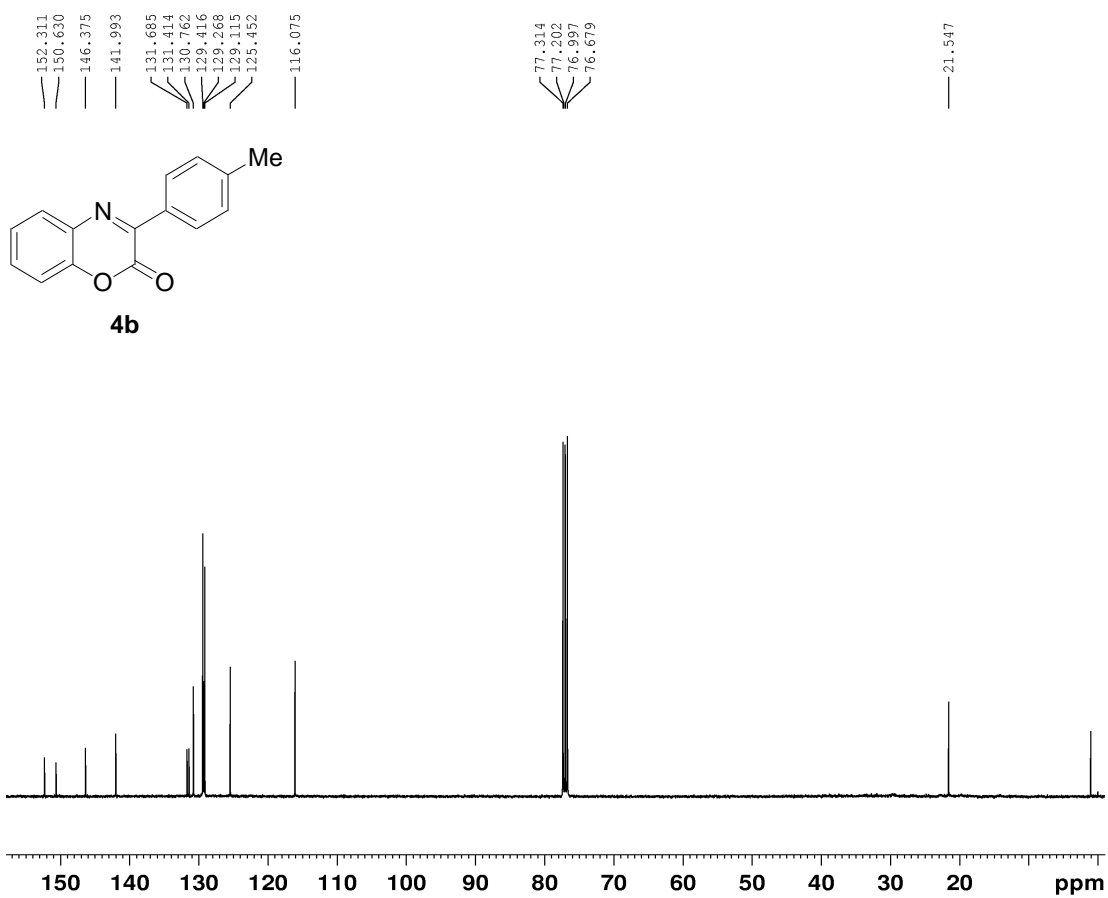

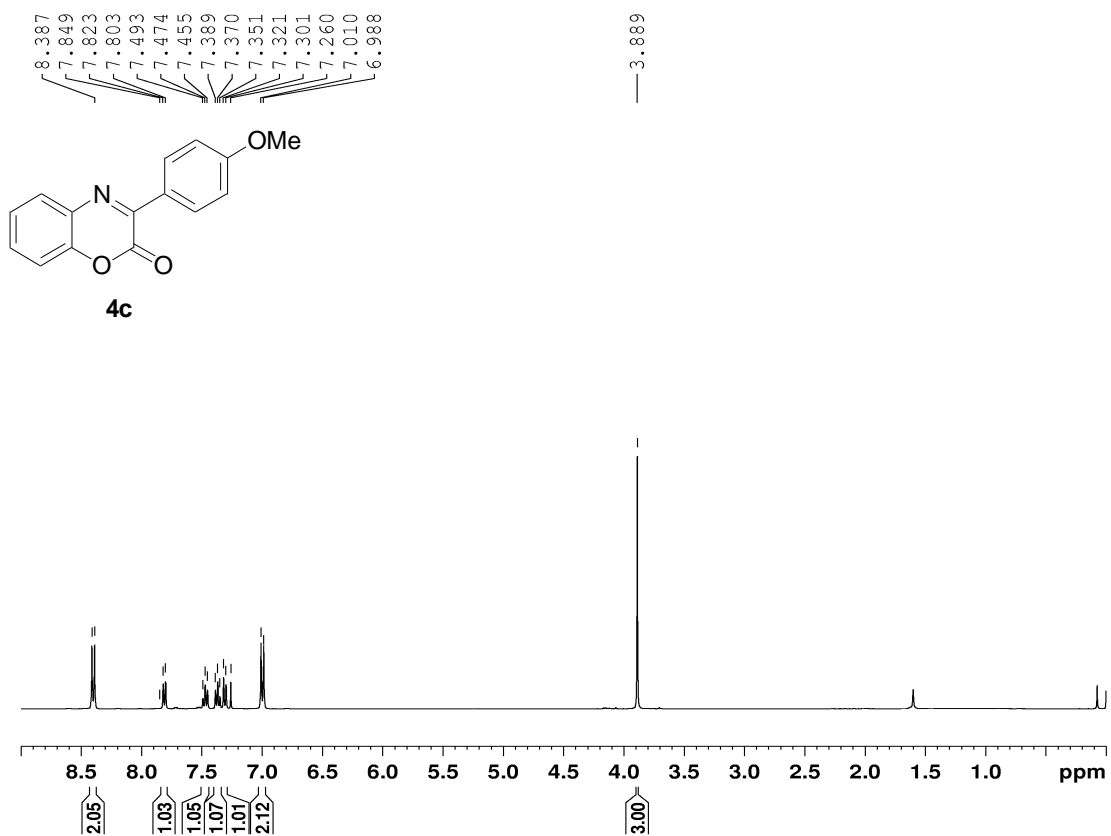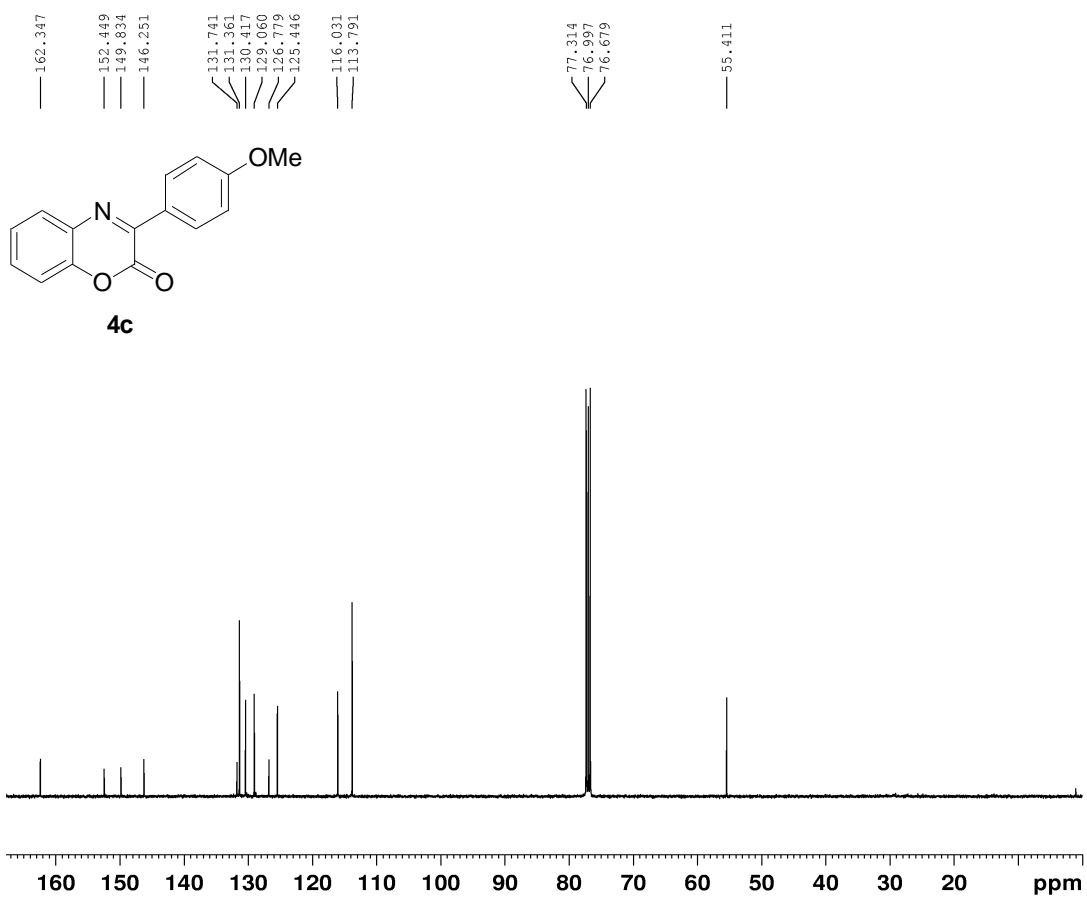

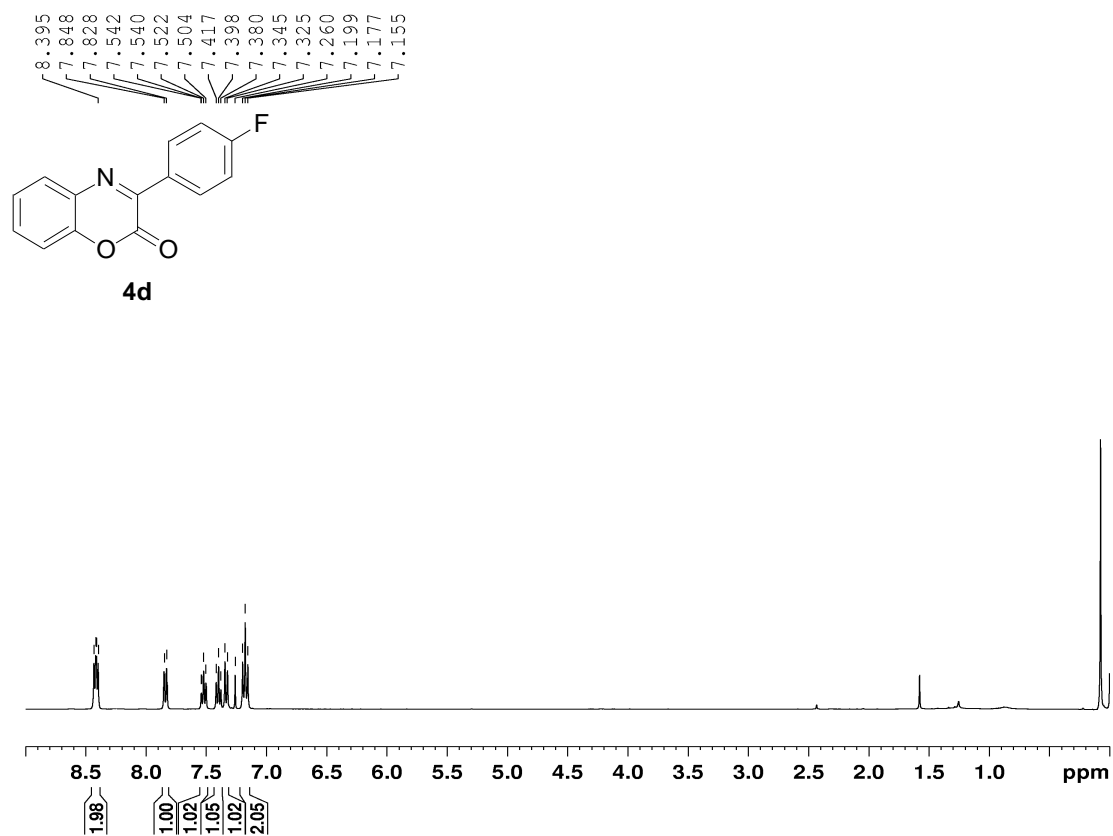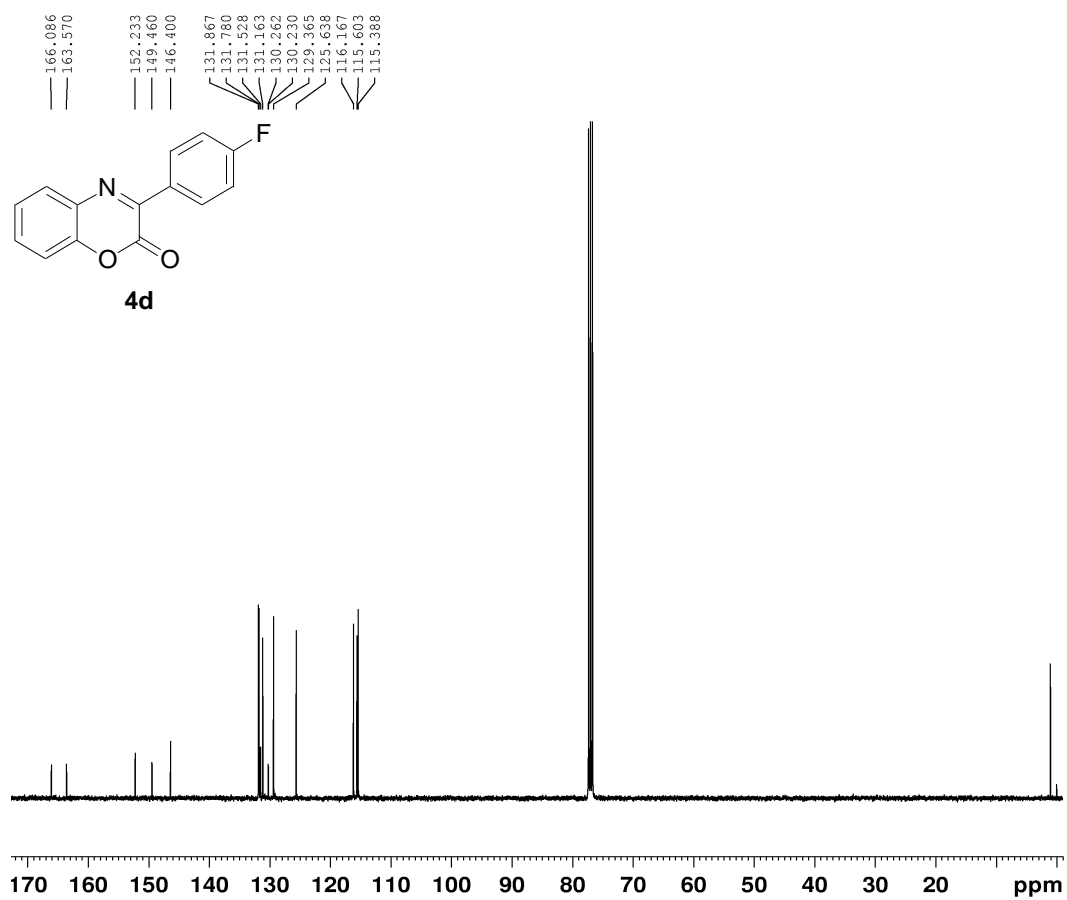

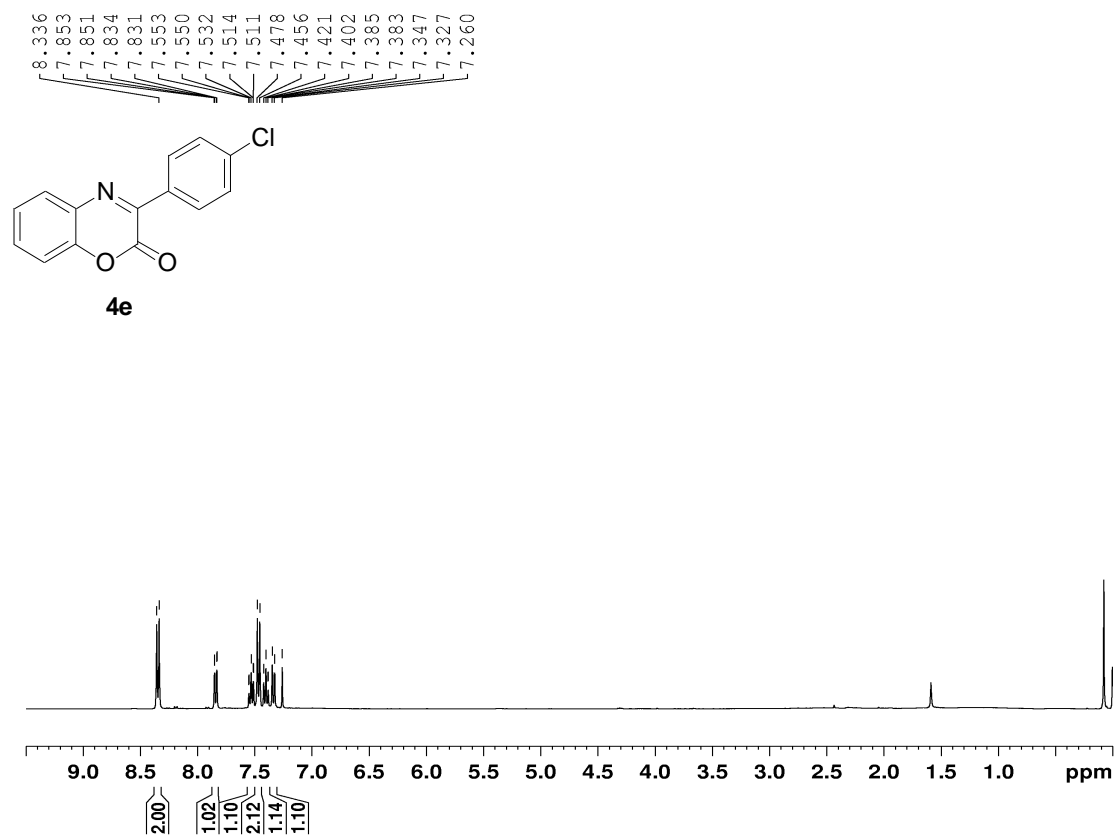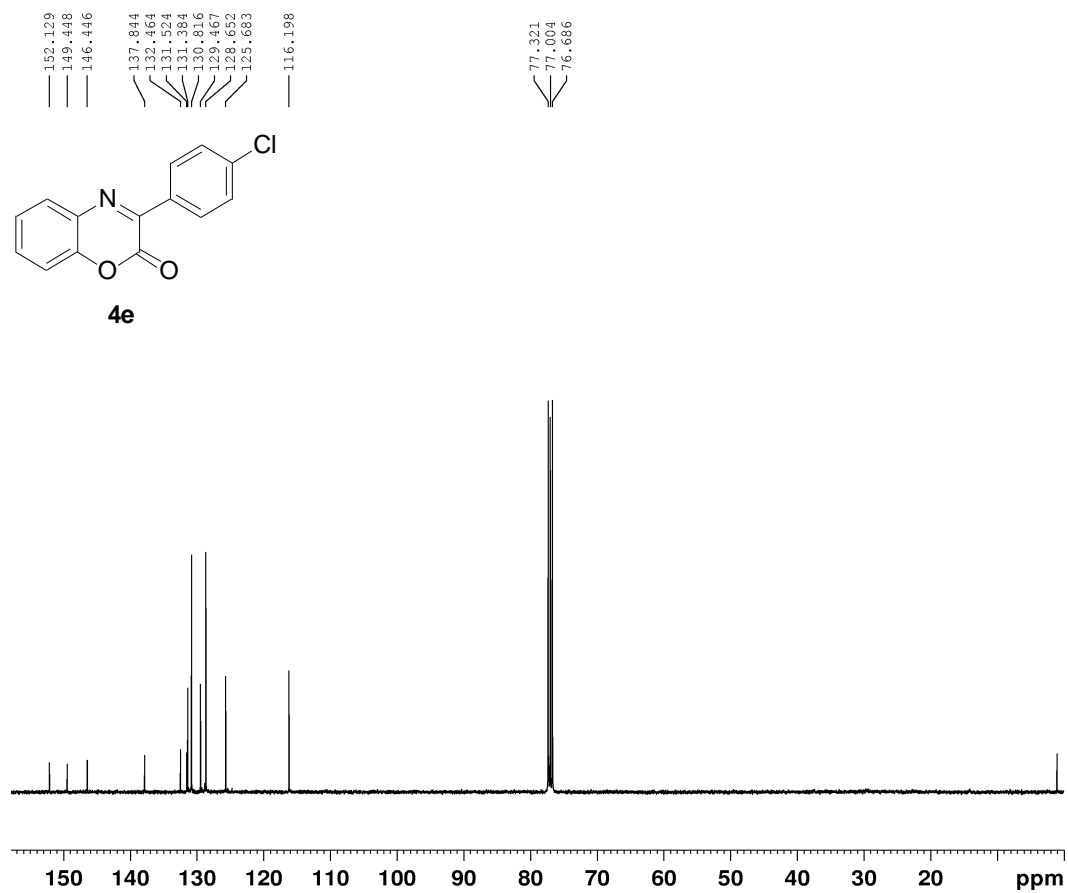

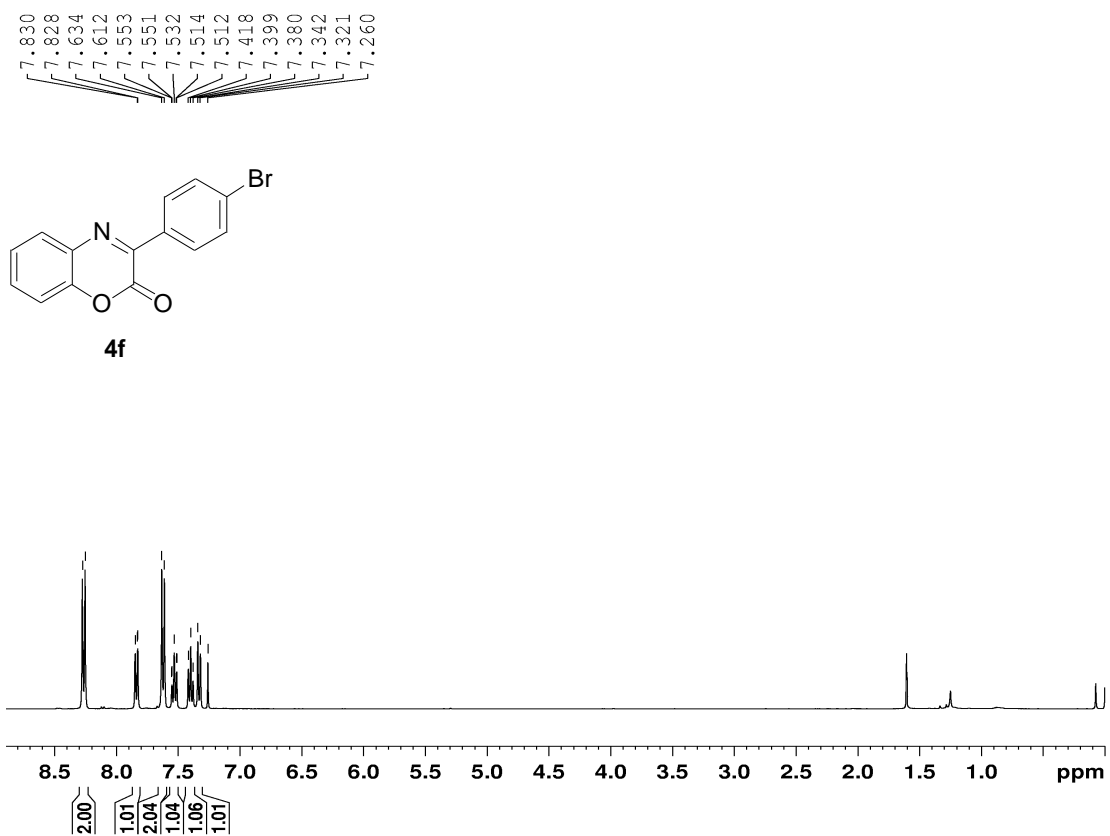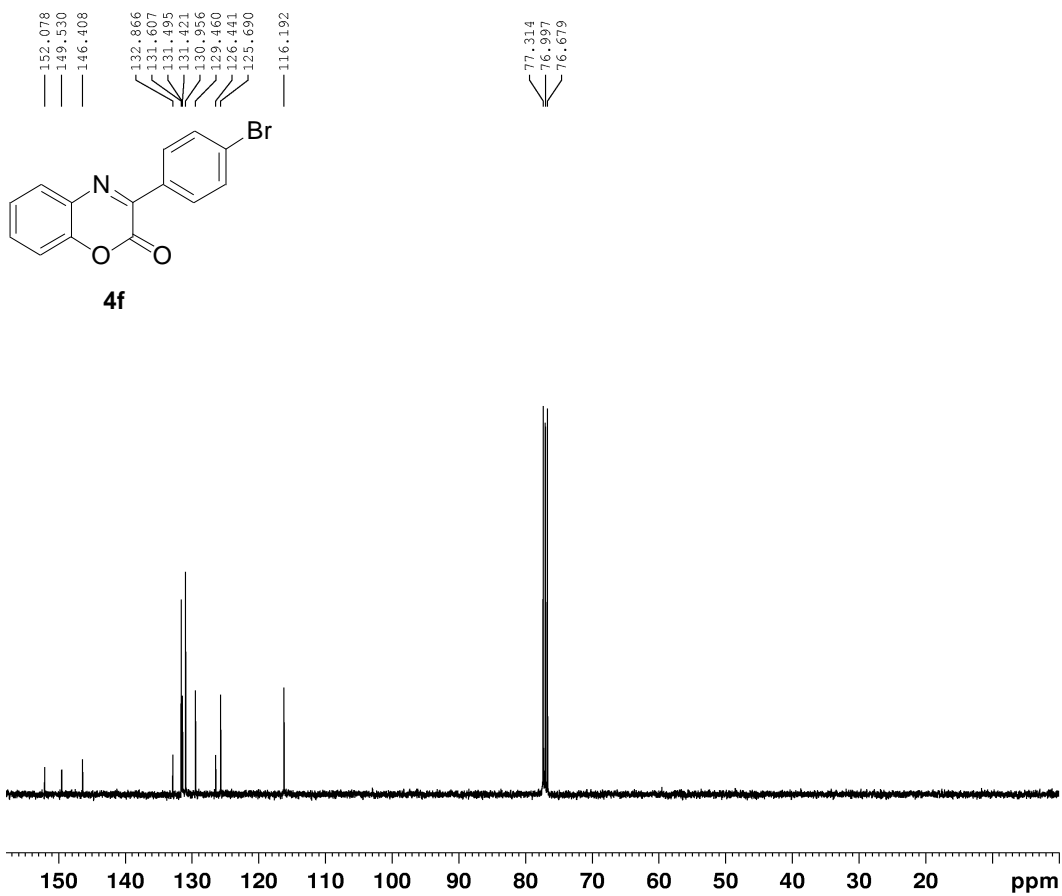

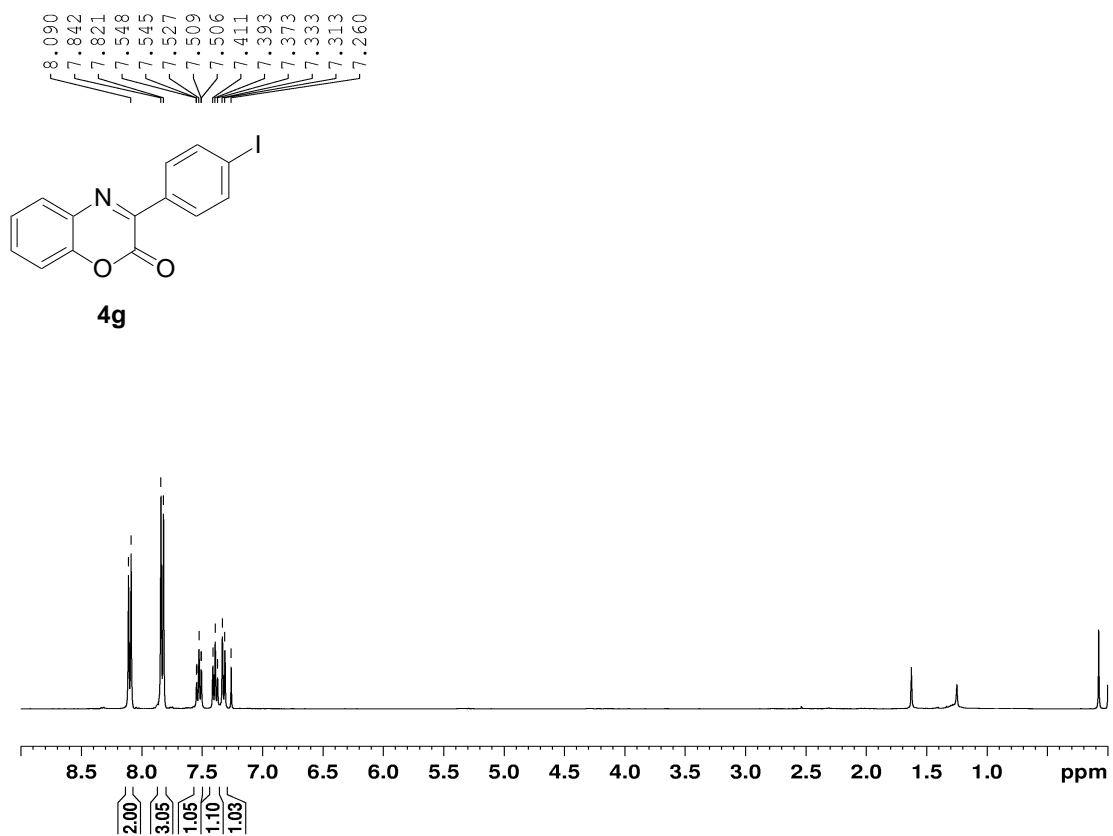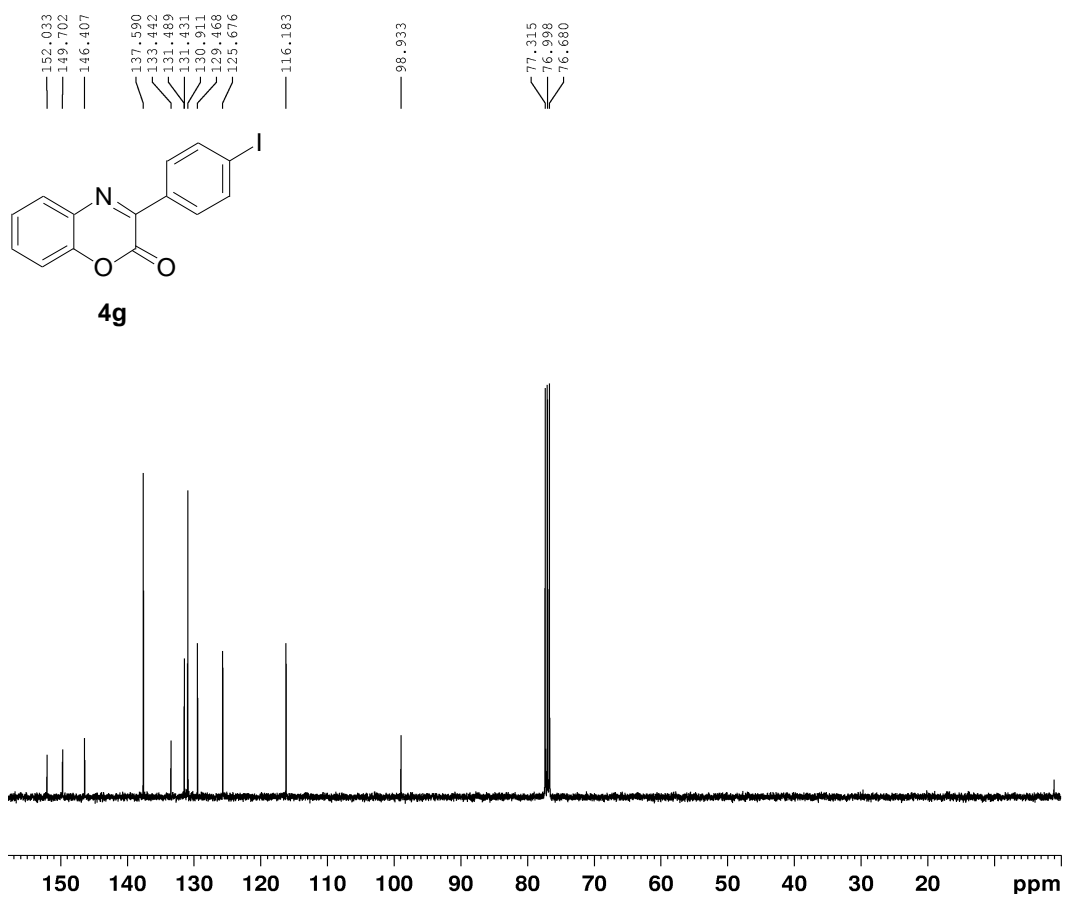



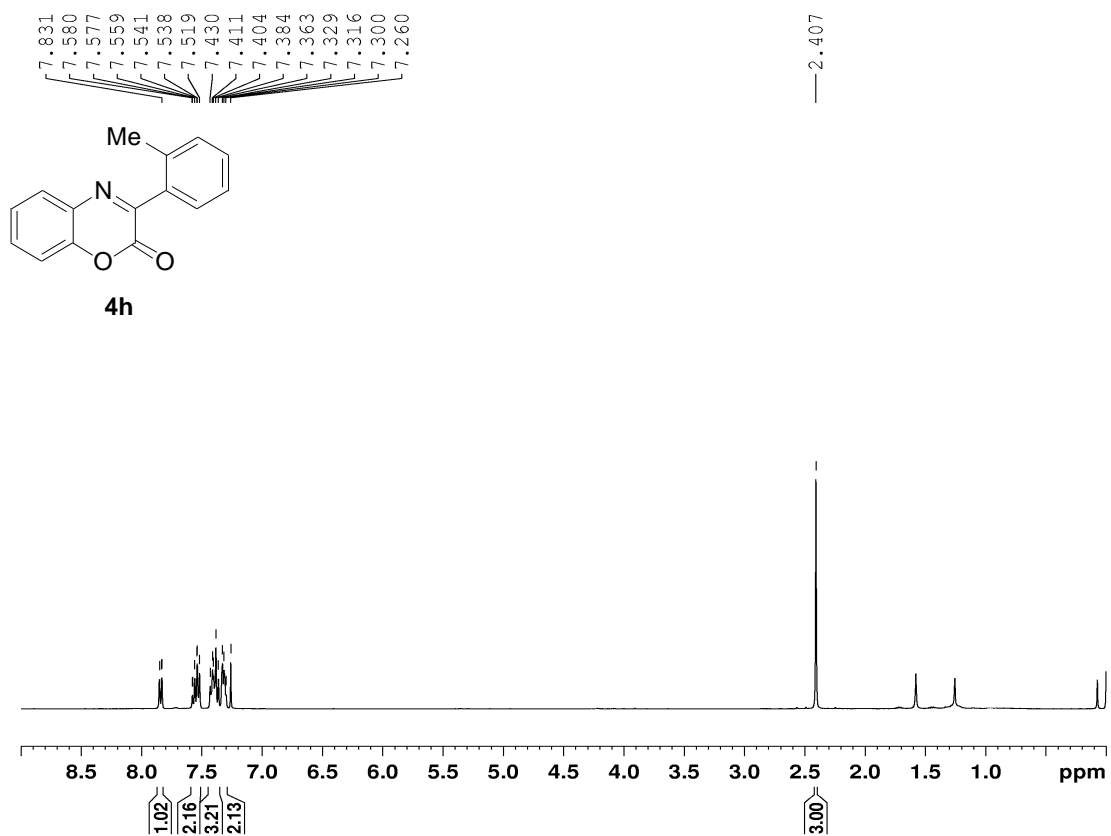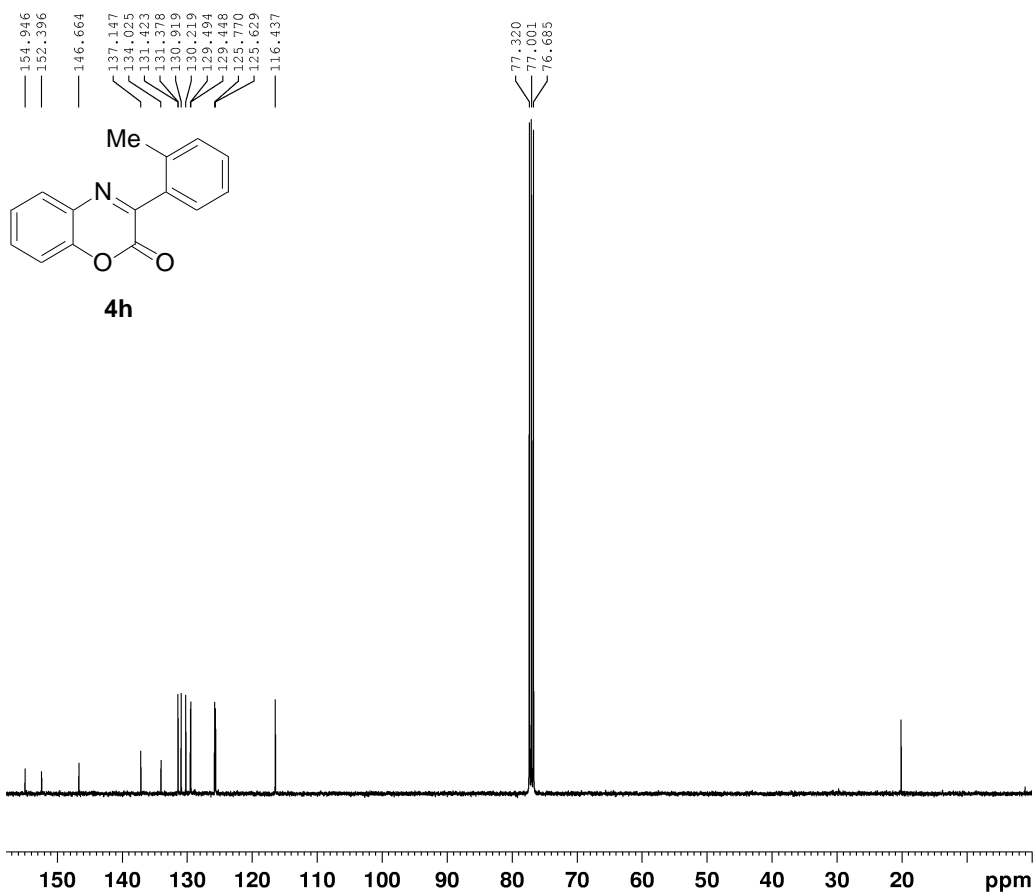

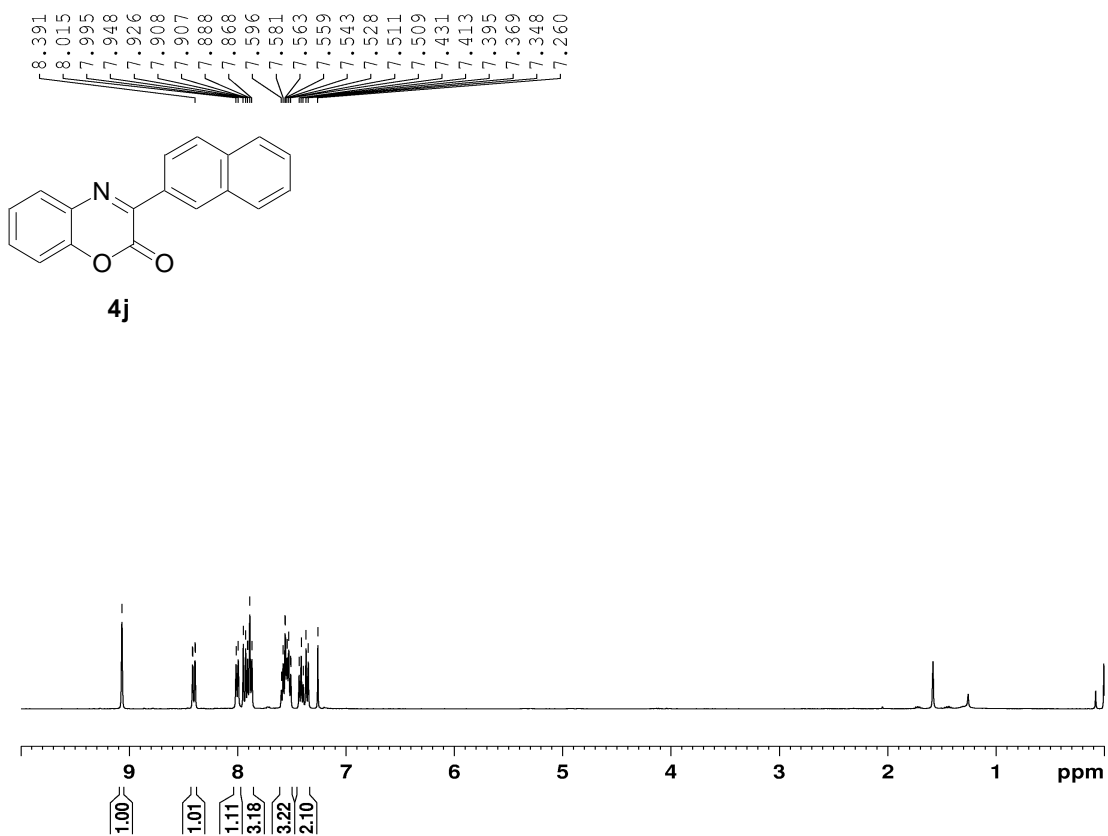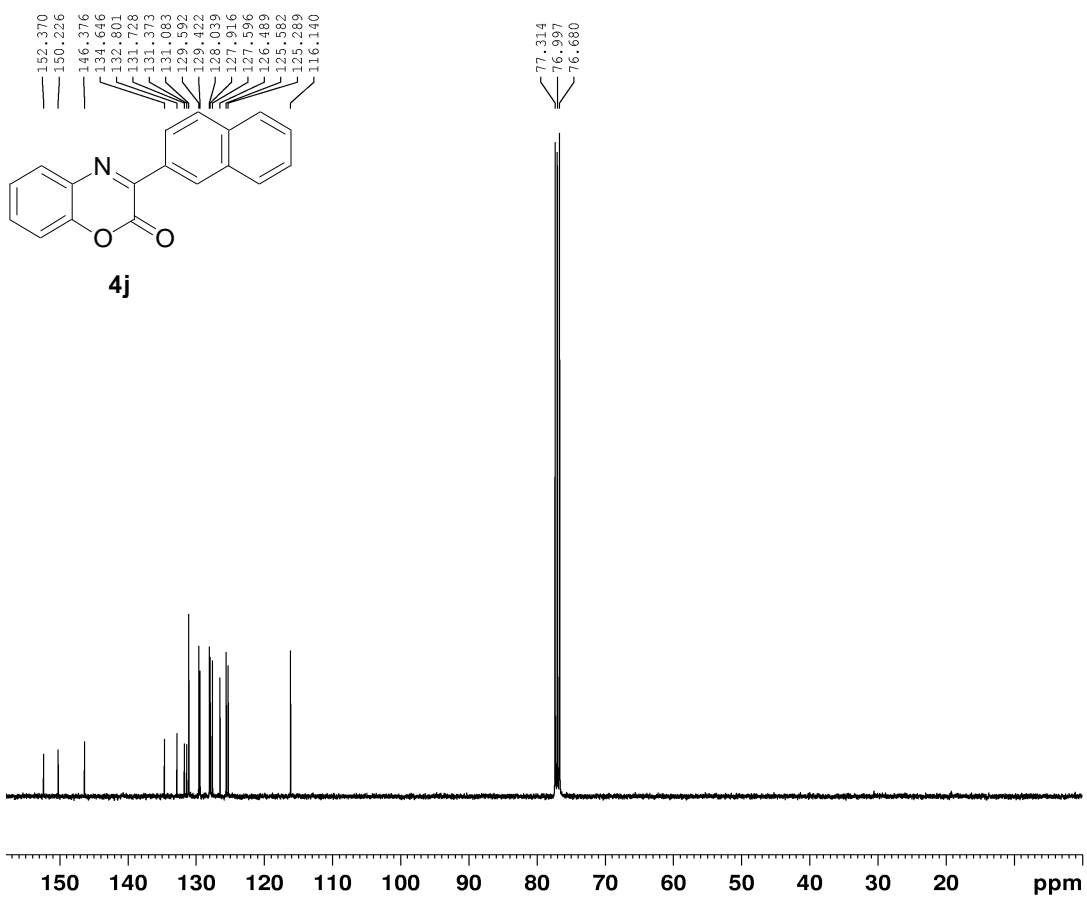

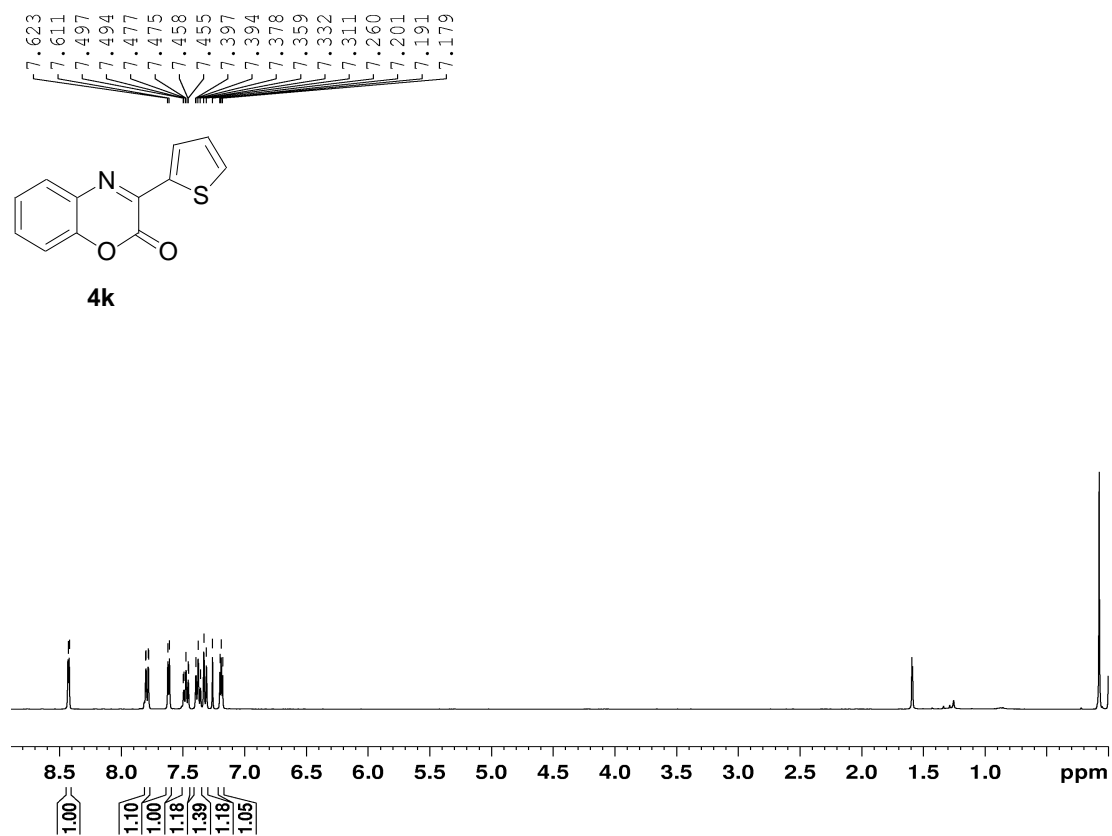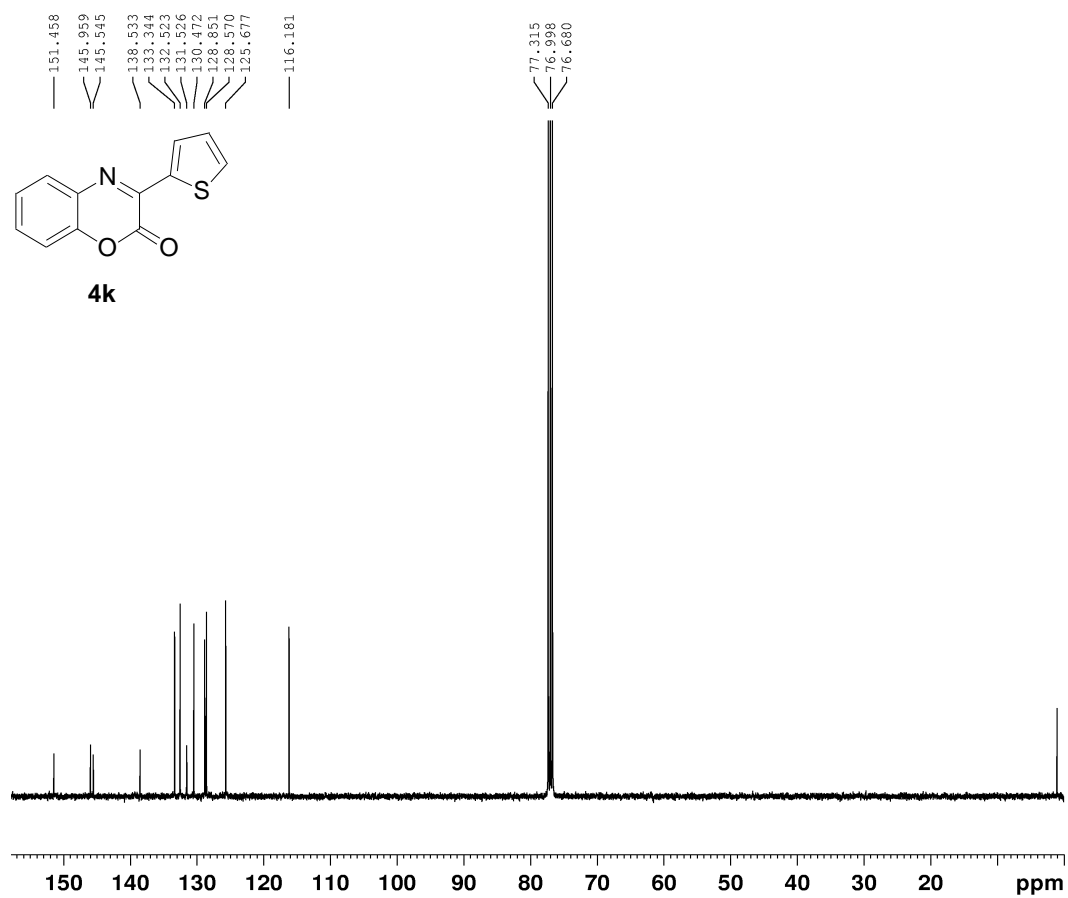

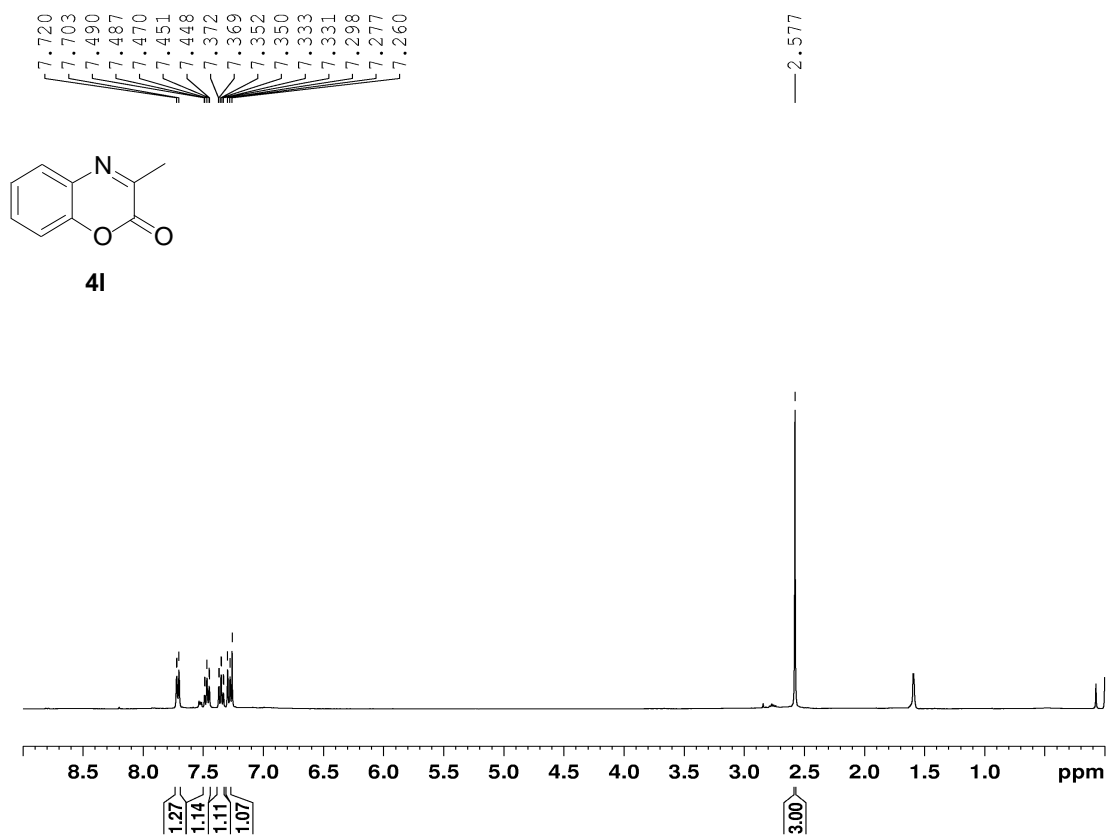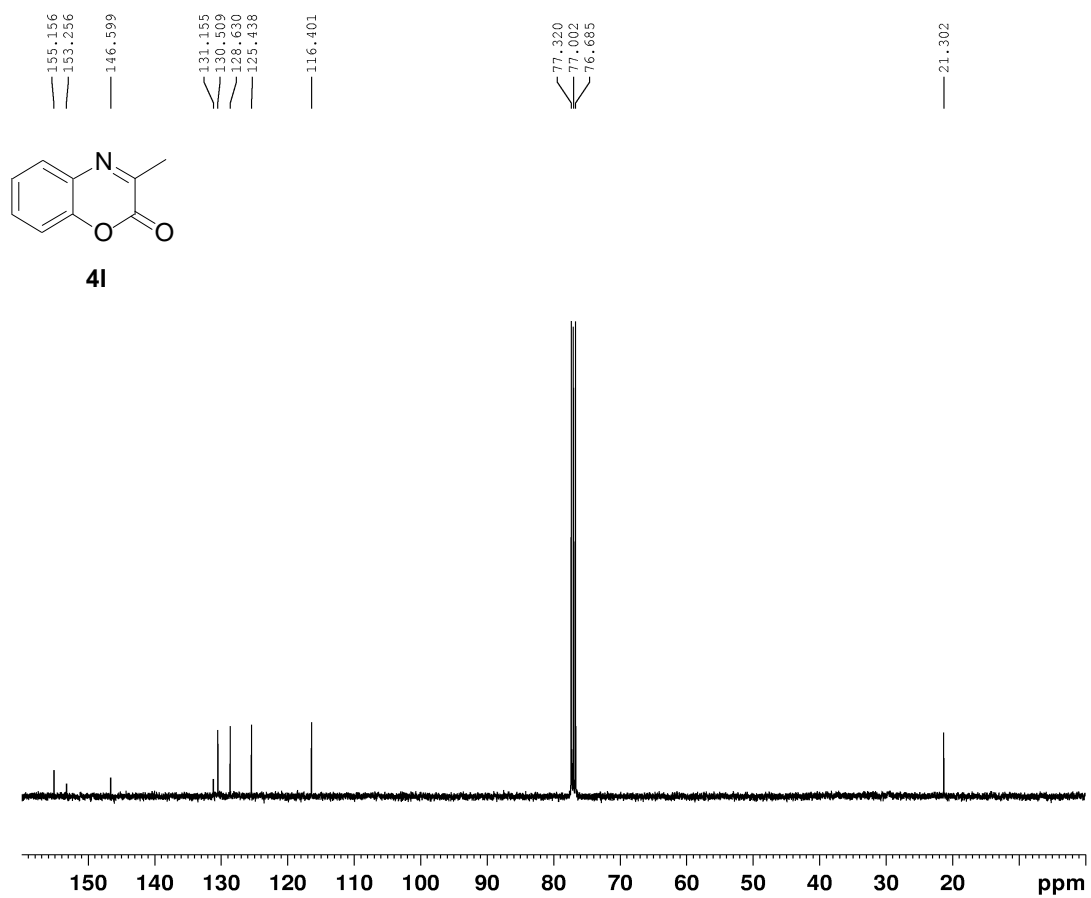

Supplement: c3ra47660j.pdf [file c3ra47660j.pdf]
